# Supplementary material
Source: PubMed Central journal article supplement (PMC3570065)
Supplement: NIHMS385069-supplement-Supp_Fig_S1-S3___Table_S1-S6.pdf [file NIHMS385069-supplement-Supp_Fig_S1-S3___Table_S1-S6.pdf]

The magnetosome membrane protein, MmsF, is a major regulator of magnetite biomineralization in *Magnetospirillum magneticum* AMB-1

Dorothee Murat<sup>a</sup>, Veesta Falahati<sup>a</sup>, Luca Bertinetti<sup>b</sup>, Roseann [Csencsits](#)<sup>c</sup>, André K rnig<sup>b</sup>, Kenneth Downing<sup>c</sup>, Damien Faivre<sup>b</sup> and Arash Komeili<sup>a,1</sup>

### Supplemental Information

**Table S1.** List of plasmids used in this study.

**Table S2.** List of strains used in this study.

**Table S3.** List of primers used in this study.

**Table S4.** Statistical comparison of crystal length measurements. Welch's t test was used to determine the statistical significance between the mean lengths of crystals from various strains.

**Table S5.** Statistical comparison of crystal width measurements. Welch's t test was used to determine the statistical significance between the mean widths of crystals from various strains.

**Table S6.** Statistical comparison of crystal shape factor. Welch's t test was used to determine the statistical significance between the mean aspect ratios of crystals from various strains.

**Figure S1.** Biomineralization in the  $\Delta amb0955$ ,  $\Delta mms6$  and  $\Delta mamFDC$  mutants.

Left panels: Electron micrographs of  $\Delta amb0955$  (A),  $\Delta mms6$  (B) and  $\Delta mamFDC$  (C) mutants. The insets show higher magnification of the regions boxed in black in the micrographs. Scale bars: 100 nm, inserts 50 nm. Right: crystal size distribution in the strains shown on the left.

**Figure S2:** Magnetite biomineralization defect in the  $\Delta R1$ -R4 mutant of AMB-1. Electron micrographs of an AMB-1 cell (left) and the  $\Delta R1$ -R4 mutant (right). The insets show higher

magnifications of the regions boxed in black in the micrographs. Scale bar: 100 nm, inset 50 nm.

**Figure S3:** MamA and MamK are expressed in the miniMAI strain. Whole cell pellets of the wild type (lanes 1 and 5),  $\Delta mamAB$  cluster strain (lanes 2 and 6) and two replicates of the miniMAI strain (lanes 3, 4, 7 and 8) were boiled and subjected to a Western blot analysis using either an anti-MamA (lanes 1-4) or an anti-MamK (lanes 5-8) antibody. Similar numbers of cells were loaded for each strain. The 24 kDa (red), 36 kDa (green) and 42 kDa (blue) protein standard markers are highlighted in the middle lane.

**Table S1**

| Plasmid name | Plasmid of origin | Experiment                                       |
|--------------|-------------------|--------------------------------------------------|
|              |                   | Deletions                                        |
| pAK249       | pAK31-derived     | Deletion plasmid for <i>mms6</i> <sub>cl</sub>   |
| pAK565       | pAK31-derived     | Deletion plasmid for <i>amb0955</i>              |
| pAK566       | pAK31-derived     | Deletion plasmid for <i>mms6</i>                 |
| pAK567       | pAK31-derived     | Deletion plasmid for <i>mmsF</i>                 |
| pAK535       | pAK31-derived     | Deletion plasmid for <i>mamCDF</i> <sub>cl</sub> |
| pAK417       | pAK31-derived     | Deletion plasmid for <i>amb1027</i>              |
| pAK349       | pAK31-derived     | Deletion plasmid for R2-R4                       |
| pAK351       | pAK31-derived     | Deletion plasmid for R6-R14                      |
|              |                   | Complementation vectors expressing :             |
| pAK562       | pAK22-derived     | <i>mms6</i>                                      |
| pAK564       | pAK253-derived    | <i>mms6</i> <sub>cl</sub>                        |
| pAK563       | pAK253-derived    | <i>mmsF</i>                                      |
| pAK525       | pAK253-derived    | <i>mamCDF</i> <sub>cl</sub>                      |
|              |                   | GFP fusions                                      |
| pAK532       | pAK22-derived     | N-terminal GFP fusion to <i>mmsF</i>             |

**Table S2**

| Strain number | Description                            | Reference              |
|---------------|----------------------------------------|------------------------|
| AK30          | AMB-1 wild type                        |                        |
| AK32          | $\Delta R5$ , chloramphenicol          | Murat et al. PNAS 2010 |
| AK36          | $\Delta R3$ , chloramphenicol          | Murat et al. PNAS 2010 |
| AK124         | <i><math>\Delta mms6cl</math></i>      | This work              |
| AK103         | <i><math>\Delta mms6</math></i>        | This work              |
| AK104         | <i><math>\Delta mmsF</math></i>        | This work              |
| AK111         | <i><math>\Delta amb0955</math></i>     | This work              |
| AK109         | <i><math>\Delta mamCDF_{cl}</math></i> | This work              |
| AK51          | $\Delta R1$                            | Murat et al. PNAS 2010 |
| AK120         | $\Delta R1$ - $\Delta R4$              | This work              |
| AK122         | miniMAI                                | This work              |
| AK123         | miniMAI_ <i>mmsF</i>                   | This work              |

## A. Genetic analysis of R3

| Primer name | Primer sequence                            | Used for deleting :      | in plasmid |
|-------------|--------------------------------------------|--------------------------|------------|
| 956cl-a     | GG <u>ACTAGT</u> TCCACATCCACAAGACCAAG      | <i>mms6<sub>cl</sub></i> | pAK249     |
| 956cl-b     | CCCATCCACTAAATTTAAATACGTCAACATCCAAAGGGATT  | <i>mms6<sub>cl</sub></i> | pAK249     |
| LD3c        | GG <u>ACTAGT</u> TGGGTCGCCACCGGATCTGA      | <i>mms6<sub>cl</sub></i> | pAK249     |
| LD3d        | GG <u>ACTAGT</u> CGCCGCCCTTCTCGGCCAGAG     | <i>mms6<sub>cl</sub></i> | pAK249     |
| 956A        | GG <u>ACTAGT</u> GGTATTTTCGGTTTCGAGCA      | <i>mms6</i>              | pAK566     |
| 956B        | CCCATCCACTAAATTTAAATAGTTGGCGATCTGAGCTGGCAC | <i>mms6</i>              | pAK566     |
| 956C        | TATTTAAATTTAGTGGATGGGCTGCGCGACGCGCTGGCCTGA | <i>mms6</i>              | pAK566     |
| 956D        | GG <u>ACTAGT</u> GTCCAGATCGCCCTTGATG       | <i>mms6</i>              | pAK566     |
| 957A        | GG <u>ACTAGT</u> GCAAACAGAAAATGCGTTGA      | <i>mmsF</i>              | pAK567     |
| 957B        | CCCATCCACTAAATTTAAATAGCGAAGGATAGCTTCAGTCAT | <i>mmsF</i>              | pAK567     |
| 957C        | TATTTAAATTTAGTGGATGGGTGGGTCGCCACCGGATCTGA  | <i>mmsF</i>              | pAK567     |
| 957D        | GG <u>ACTAGT</u> TGCCTTCATTGCTGTTTTCC      | <i>mmsF</i>              | pAK567     |
| 955A        | GG <u>ACTAGT</u> GTCCAGCTTGACGATGATTG      | <i>amb0955</i>           | pAK565     |
| 955B        | CCCATCCACTAAATTTAAATAGTGCCACAGGAAACAAGCCAC | <i>amb0955</i>           | pAK565     |
| 955C        | TATTTAAATTTAGTGGATGGGAAGGCGGGAAGGTGCGACTAA | <i>amb0955</i>           | pAK565     |
| 955D        | GG <u>ACTAGT</u> GGCTCCAGAAACGAAACATC      | <i>amb0955</i>           | pAK565     |
| LD3a        | GG <u>ACTAGT</u> CCGGCAGCACAGGCCGCTGA      | <i>mamFDC</i>            | pAK535     |
| LD3b        | CCCATCCACTAAATTTAAATACCCAATCCCCTGCGAATTTG  | <i>mamFDC</i>            | pAK535     |
| R3L-c       | TATTTAAATTTAGTGGATGGGACGTACAGCCTGGCAAGAAT  | <i>mamFDC</i>            | pAK535     |
| R3L-d       | GG <u>ACTAGT</u> AGAAACGAAACATCCCAACG      | <i>mamFDC</i>            | pAK535     |

## B. miniMAI

| Primer Name | Primer sequence                            | Used to delete | In plasmid |
|-------------|--------------------------------------------|----------------|------------|
| LD2a        | GG <u>ACTAGT</u> CGGACCGCGATAAAGTTCTAA     | R2-R4          | pAK349     |
| LD2b        | CCCATCCACTAAATTTAAATAGCCGAGCGGGTCTCATTGCAG | R2-R4          | pAK349     |
| LD4c        | TATTTAAATTTAGTGGATGGGTTCTGGTGAAGAGAGCATCTG | R2-R4          | pAK349     |
| LD4d.1      | GG <u>ACTAGT</u> TGATGAACGCGGTATTGGACA     | R2-R4          | pAK349     |
| LD6a.1      | GG <u>ACTAGT</u> TCGCCTATTTGGTTGAGG        | R6-R14         | pAK351     |
| LD6b.1      | CCCATCCACTAAATTTAAATACGTCCAGGTTGTCCAAGAG   | R6-R14         | pAK351     |
| LD13c       | TATTTAAATTTAGTGGATGGGATGGGGATCAGCAAGCGCGG  | R6-R14         | pAK351     |
| LD13d.1     | GG <u>ACTAGT</u> GAAATGTCATCCGACAGCAGA     | R6-R14         | pAK351     |

## C. Complementation

| Primer name | Primer sequences | Expressed gene | Plasmid |
|-------------|------------------|----------------|---------|
|-------------|------------------|----------------|---------|

|              |                                                |                                           |        |
|--------------|------------------------------------------------|-------------------------------------------|--------|
| 955 3'Not1   | GG <u><b>GCGGCCGC</b></u> TTAGTCGCACCTTCCCGCC  | <i>amb0955, mms6, mmsF</i>                | pAK564 |
| 957 5' Spe1  | GG <u><b>ACTAGT</b></u> ATGACTGAAGCTATCCTTCG   | <i>amb0955, mms6, mmsF</i>                | pAK564 |
| 956 3' Spe1  | GG <u><b>ACTAGT</b></u> TCAGGCCAGCGCGTCGCG     | <i>mms6</i>                               | pAK562 |
| 956 5'EcoR1  | GG <u><b>GAATTC</b></u> GTGCCAGCTCAGATCGC      | <i>mms6</i>                               | pAK562 |
| 957 3'Not1   | GG <u><b>GCGGCCGC</b></u> TCAGATCCGGTGGGCGACCC | <i>mmsF</i>                               | pAK563 |
| 957 5' Spe1  | GG <u><b>ACTAGT</b></u> ATGACTGAAGCTATCCTTCG   | <i>mmsF</i>                               | pAK563 |
| 5Spe-amb0954 | GG <u><b>ACTAGT</b></u> ATGGCCGCTCAGGTTGGAG    | <i>amb0951, amb0952, amb0953, amb0954</i> | pAK525 |
| 3Not_mamC    | GG <u><b>GCGGCCGC</b></u> TCAGGCCAGTTCGTCCCGC  | <i>amb0951, amb0952, amb0953, amb0954</i> | pAK525 |

#### D. GFP Fusions

| Primer name | Primer sequence                              | Plasmid |
|-------------|----------------------------------------------|---------|
| 5-Bam-957   | GG <u><b>GATCC</b></u> ACTGAAGCTATCCTTCGC    | pAK532  |
| 3-Spe-957   | GG <u><b>ACTAGT</b></u> TCAGATCCGGTGGGCGACCC | pAK532  |

**Table S3**

|                          | wt     | LD3    | LD3+ cluster | LD3 + mmsF | $\Delta$ mms6cl | $\Delta$ mms6cl+mms6cl | $\Delta$ mms6cl+955 | $\Delta$ mms6cl+mms6 | $\Delta$ mms6cl + mmsF | $\Delta$ 955 | $\Delta$ mms6 | $\Delta$ mms6 + mms6 | $\Delta$ mmsF | $\Delta$ mmsF+mmsF | $\Delta$ mamFDC |
|--------------------------|--------|--------|--------------|------------|-----------------|------------------------|---------------------|----------------------|------------------------|--------------|---------------|----------------------|---------------|--------------------|-----------------|
| wt                       | x      | <.0001 | 0.269        | <.0001     | <.0001          | 0.0003                 | <.0001              | <.0001               | <.0001                 | 0.5513       | <.0001        | 0.0017               | <.0001        | <.0001             | 0.377           |
| LD3                      | <.0001 | x      | <.0001       | <.0001     | 0.6491          | <.0001                 | 0.0015              | <.0001               | <.0001                 | <.0001       | <.0001        | <.0001               | <.0001        | <.0001             | <.0001          |
| LD3+ cluster             | 0.2690 | <.0001 | x            | 0.0002     | <.0001          | 0.0107                 | <.0001              | <.0001               | <.0001                 | 0.8894       | <.0001        | 0.0254               | <.0001        | 0.0035             | 0.8713          |
| LD3+ mmsF                | <.0001 | <.0001 | 0.0002       | x          | <.0001          | 0.3023                 | <.0001              | <.0001               | 0.0028                 | 0.0124       | 0.1619        | 0.4585               | <.0001        | 0.3879             | 0.0002          |
| $\Delta$ mms6cl          | <.0001 | 0.0649 | <.0001       | <.0001     | x               | <.0001                 | 0.0028              | <.0001               | <.0001                 | <.0001       | <.0001        | <.0001               | <.0001        | <.0001             | <.0001          |
| $\Delta$ mms6cl + mms6cl | 0.0003 | <.0001 | 0.0107       | 0.3023     | 0.3023          | x                      | <.0001              | <.0001               | <.0001                 | 0.0709       | 0.0177        | 0.9109               | <.0001        | 0.8342             | 0.0085          |
| $\Delta$ mms6cl + 955    | <.0001 | <.0001 | <.0001       | <.0001     | <.0001          | <.0001                 | x                   | 0.0002               | <.0001                 | <.0001       | <.0001        | <.0001               | 0.5735        | <.0001             | <.0001          |
| $\Delta$ mms6cl + mms6   | <.0001 | <.0001 | <.0001       | <.0001     | <.0001          | <.0001                 | 0.0002              | x                    | <.0001                 | <.0001       | <.0001        | <.0001               | <.0001        | <.0001             | <.0001          |
| $\Delta$ mms6cl + mmsF   | <.0001 | <.0001 | <.0001       | 0.0028     | <.0001          | <.0001                 | <.0001              | <.0001               | x                      | <.0001       | 0.13          | 0.0019               | <.0001        | <.0001             | <.0001          |
| $\Delta$ 955             | 0.5513 | <.0001 | 0.8894       | 0.0124     | <.0001          | 0.0709                 | <.0001              | <.0001               | <.0001                 | x            | 0.0008        | 0.0825               | <.0001        | 0.0482             | 0.9745          |
| $\Delta$ mms6            | <.0001 | <.0001 | <.0001       | 0.1619     | <.0001          | 0.0177                 | <.0001              | <.0001               | 0.13                   | 0.0008       | x             | 0.0628               | <.0001        | 0.0234             | <.0001          |
| $\Delta$ mms6 + mms6     | 0.0017 | <.0001 | 0.0254       | 0.4585     | <.0001          | 0.9109                 | <.0001              | <.0001               | <.0001                 | 0.0825       | 0.0628        | x                    | <.0001        | 0.9541             | 0.0209          |
| $\Delta$ mmsF            | <.0001 | <.0001 | <.0001       | <.0001     | <.0001          | <.0001                 | 0.5735              | <.0001               | <.0001                 | <.0001       | <.0001        | <.0001               | x             | <.0001             | <.0001          |
| $\Delta$ mmsF + mmsF     | <.0001 | <.0001 | 0.0035       | 0.3879     | <.0001          | 0.8342                 | <.0001              | <.0001               | <.0001                 | 0.0482       | 0.0234        | 0.9541               | <.0001        | x                  | 0.0031          |
| $\Delta$ mamFDC          | 0.3770 | <.0001 | 0.8713       | 0.0002     | <.0001          | 0.0085                 | <.0001              | <.0001               | <.0001                 | 0.9745       | <.0001        | 0.0209               | <.0001        | 0.0031             | x               |

|                  | wt     | LD3    | LD3+ cluster | LD3 + mmsF | Δmms6cl | Δmms6cl+ mms6cl | Δmms6cl+ 955 | Δmms6cl+ mms6 | Δmms6cl + mmsF | Δ955   | Δmms6  | Δmms6 + mms6 | ΔmmsF  | ΔmmsF+ mmsF | ΔmamFDC |
|------------------|--------|--------|--------------|------------|---------|-----------------|--------------|---------------|----------------|--------|--------|--------------|--------|-------------|---------|
| wt               | x      | <.0001 | <.0001       | <.0001     | <.0001  | <.0001          | <.0001       |               | <.0001         | 0.4666 | <.0001 | 0.004        | <.0001 | <.0001      | <.0001  |
| LD3              | <.0001 | x      | <.0001       | <.0001     | 0.0005  | <.0001          | <.0001       |               | <.0001         | <.0001 | <.0001 | <.0001       | <.0001 | <.0001      | <.0001  |
| LD3+ cluster     | <.0001 | <.0001 | x            | 0.5642     | <.0001  | 0.9354          | <.0001       |               | <.0001         | 0.0070 | <.0001 | 0.2319       | <.0001 | 0.5445      | 0.3629  |
| LD3+ mmsF        | <.0001 | <.0001 | 0.5642       | x          | <.0001  | 0.6348          | <.0001       |               | <.0001         | 0.0202 | <.0001 | 0.4563       | <.0001 | 0.2385      | 0.7468  |
| Δmms6cl          | <.0001 | 0.0005 | <.0001       | <.0001     | x       | <.0001          | 0.029        |               | <.0001         | <.0001 | <.0001 | <.0001       | <.0001 | <.0001      | <.0001  |
| Δmms6cl + mms6cl | <.0001 | <.0001 | 0.9354       | 0.6348     | <.0001  | x               | <.0001       |               | <.0001         | 0.0091 | <.0001 | 0.2686       | <.0001 | 0.5075      | 0.4269  |
| Δmms6cl + 955    | <.0001 | <.0001 | <.0001       | <.0001     | 0.0290  | <.0001          | x            |               | <.0001         | <.0001 | <.0001 | <.0001       | 0.0929 | <.0001      | <.0001  |
| Δmms6cl + mms6   |        |        |              |            |         |                 |              | x             |                |        |        |              |        |             |         |
| Δmms6cl + mmsF   | <.0001 | <.0001 | <.0001       | <.0001     | <.0001  | <.0001          | <.0001       |               | x              | <.0001 | 0.0128 | <.0001       | <.0001 | <.0001      | <.0001  |
| Δ955             | 0.4666 | <.0001 | 0.0070       | 0.0202     | <.0001  | 0.0091          | <.0001       |               | <.0001         | x      | <.0001 | 0.1298       | <.0001 | 0.0021      | 0.0338  |
| Δmms6            | <.0001 | <.0001 | <.0001       | <.0001     | <.0001  | <.0001          | <.0001       |               | 0.0128         | <.0001 | x      | <.0001       | <.0001 | <.0001      | <.0001  |
| Δmms6 + mms6     | 0.0040 | <.0001 | 0.2319       | 0.4563     | <.0001  | 0.2686          | <.0001       |               | <.0001         | 0.1298 | <.0001 | x            | <.0001 | 0.0980      | 0.6185  |
| ΔmmsF            | <.0001 | <.0001 | <.0001       | <.0001     | <.0001  | <.0001          | 0.0929       |               | <.0001         | <.0001 | <.0001 | <.0001       | x      | <.0001      | <.0001  |
| ΔmmsF + mmsF     | <.0001 | <.0001 | 0.5445       | 0.2385     | <.0001  | 0.5075          | <.0001       |               | <.0001         | 0.0021 | <.0001 | 0.0980       | <.0001 | x           | 0.1282  |
| ΔmamFDC          | <.0001 | <.0001 | 0.3629       | 0.7468     | <.0001  | 0.4269          | <.0001       |               | <.0001         | 0.0338 | <.0001 | 0.6185       | <.0001 | 0.1282      | x       |



|                         | wt     | LD3    | LD3+ cluster | LD3 + mmsF | Δmms6cl | Δmms6cl+ mms6cl | Δmms6cl+ 955 | Δmms6cl+ mms6 | Δmms6cl + mmsF | Δ955   | Δmms6  | Δmms6 + mms6 | ΔmmsF  | ΔmmsF+ mmsF | ΔmamFDC |
|-------------------------|--------|--------|--------------|------------|---------|-----------------|--------------|---------------|----------------|--------|--------|--------------|--------|-------------|---------|
| <b>wt</b>               | x      | <.0001 | <.0001       | 0.2570     | <.0001  | <.0001          | <.0001       | <.0001        | <.0001         | 0.2478 | <.0001 | 0.6504       | <.0001 | <.0001      | <.0001  |
| <b>LD3</b>              | <.0001 | x      | <.0001       | <.0001     | 0.0008  | <.0001          | 0.6076       | <.0001        | 0.0023         | <.0001 | <.0001 | <.0001       | 0.0030 | <.0001      | <.0001  |
| <b>LD3+ cluster</b>     | <.0001 | <.0001 | x            | <.0001     | 0.1916  | <.0001          | <.0001       | 0.1409        | 0.0172         | <.0001 | 0.7983 | <.0001       | 0.0141 | <.0001      | 0.0678  |
| <b>LD3+ mmsF</b>        | 0.2570 | <.0001 | <.0001       | x          | <.0001  | <.0001          | <.0001       | <.0001        | <.0001         | 0.6931 | <.0001 | 0.5927       | <.0001 | <.0001      | <.0001  |
| <b>Δmms6cl</b>          | <.0001 | 0.0008 | 0.1916       | <.0001     | x       | <.0001          | 0.0093       | 0.0251        | 0.4749         | <.0001 | 0.2843 | <.0001       | 0.4334 | <.0001      | 0.0052  |
| <b>Δmms6cl + mms6cl</b> | <.0001 | <.0001 | <.0001       | <.0001     | <.0001  | x               | <.0001       | 0.0118        | <.0001         | 0.0082 | <.0001 | <.0001       | <.0001 | 0.3873      | 0.0009  |
| <b>Δmms6cl + 955</b>    | <.0001 | 0.6076 | <.0001       | <.0001     | 0.0093  | <.0001          | x            | <.0001        | 0.0259         | <.0001 | 0.0002 | <.0001       | 0.0308 | <.0001      | <.0001  |
| <b>Δmms6cl + mms6</b>   | <.0001 | <.0001 | 0.1409       | <.0001     | 0.0251  | 0.0118          | <.0001       | x             | 0.0014         | 0.0011 | 0.1051 | <.0001       | 0.0012 | 0.0441      | 0.9531  |
| <b>Δmms6cl + mmsF</b>   | <.0001 | 0.0023 | 0.0172       | <.0001     | 0.4749  | <.0001          | 0.0259       | 0.0014        | x              | <.0001 | 0.0376 | <.0001       | 0.9338 | <.0001      | <.0001  |
| <b>Δ955</b>             | 0.2478 | <.0001 | <.0001       | 0.6931     | <.0001  | 0.0082          | <.0001       | 0.0011        | <.0001         | x      | <.0001 | 0.4656       | <.0001 | 0.0016      | <.0001  |
| <b>Δmms6</b>            | <.0001 | <.0001 | 0.7983       | <.0001     | 0.2843  | <.0001          | 0.0002       | 0.1051        | 0.0376         | <.0001 | x      | <.0001       | 0.0313 | <.0001      | 0.0424  |
| <b>Δmms6 + mms6</b>     | 0.6504 | <.0001 | <.0001       | 0.5927     | <.0001  | <.0001          | <.0001       | <.0001        | <.0001         | 0.4656 | <.0001 | x            | <.0001 | <.0001      | <.0001  |
| <b>ΔmmsF</b>            | <.0001 | 0.0030 | 0.0141       | <.0001     | 0.4334  | <.0001          | 0.0308       | 0.0012        | 0.9338         | <.0001 | 0.0313 | <.0001       | x      | <.0001      | <.0001  |
| <b>ΔmmsF + mmsF</b>     | <.0001 | <.0001 | <.0001       | <.0001     | <.0001  | 0.3873          | <.0001       | 0.0441        | <.0001         | 0.0016 | <.0001 | <.0001       | <.0001 | x           | 0.0085  |
| <b>ΔmamFDC</b>          | <.0001 | <.0001 | 0.0678       | <.0001     | 0.0052  | 0.0009          | <.0001       | 0.9531        | <.0001         | <.0001 | 0.0424 | <.0001       | <.0001 | 0.0085      | x       |

A.

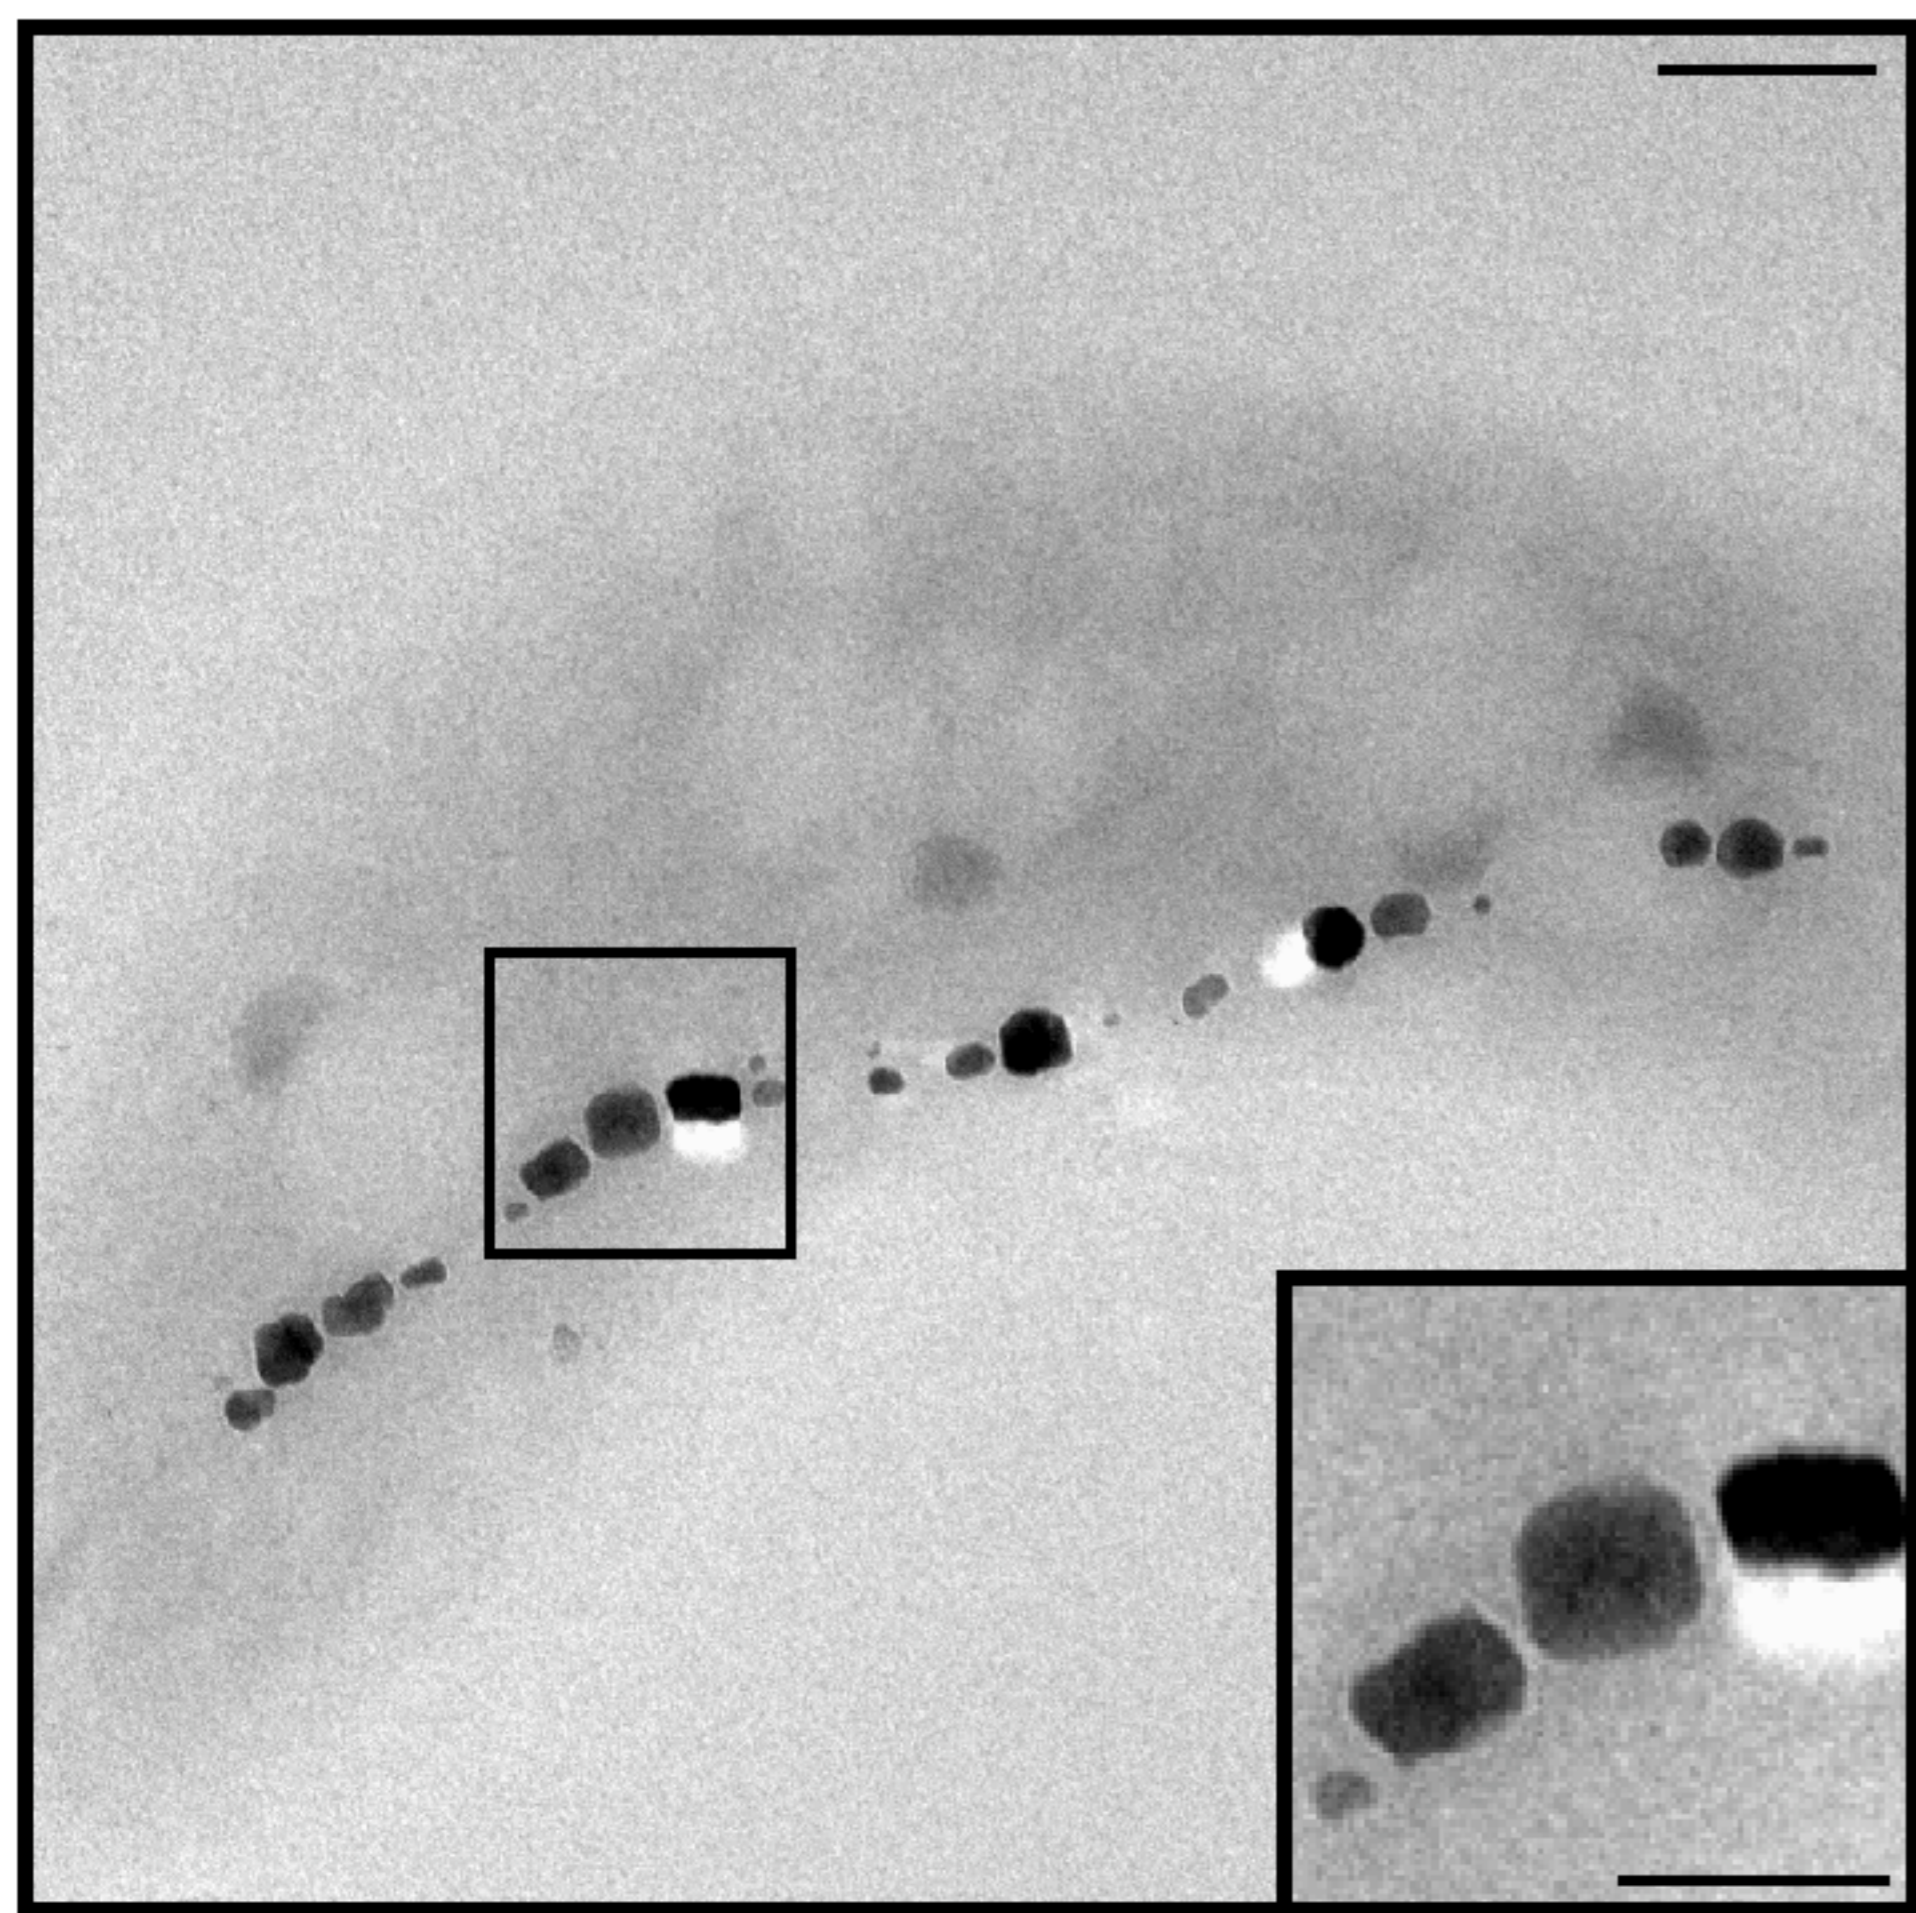 $\Delta amb0955$ 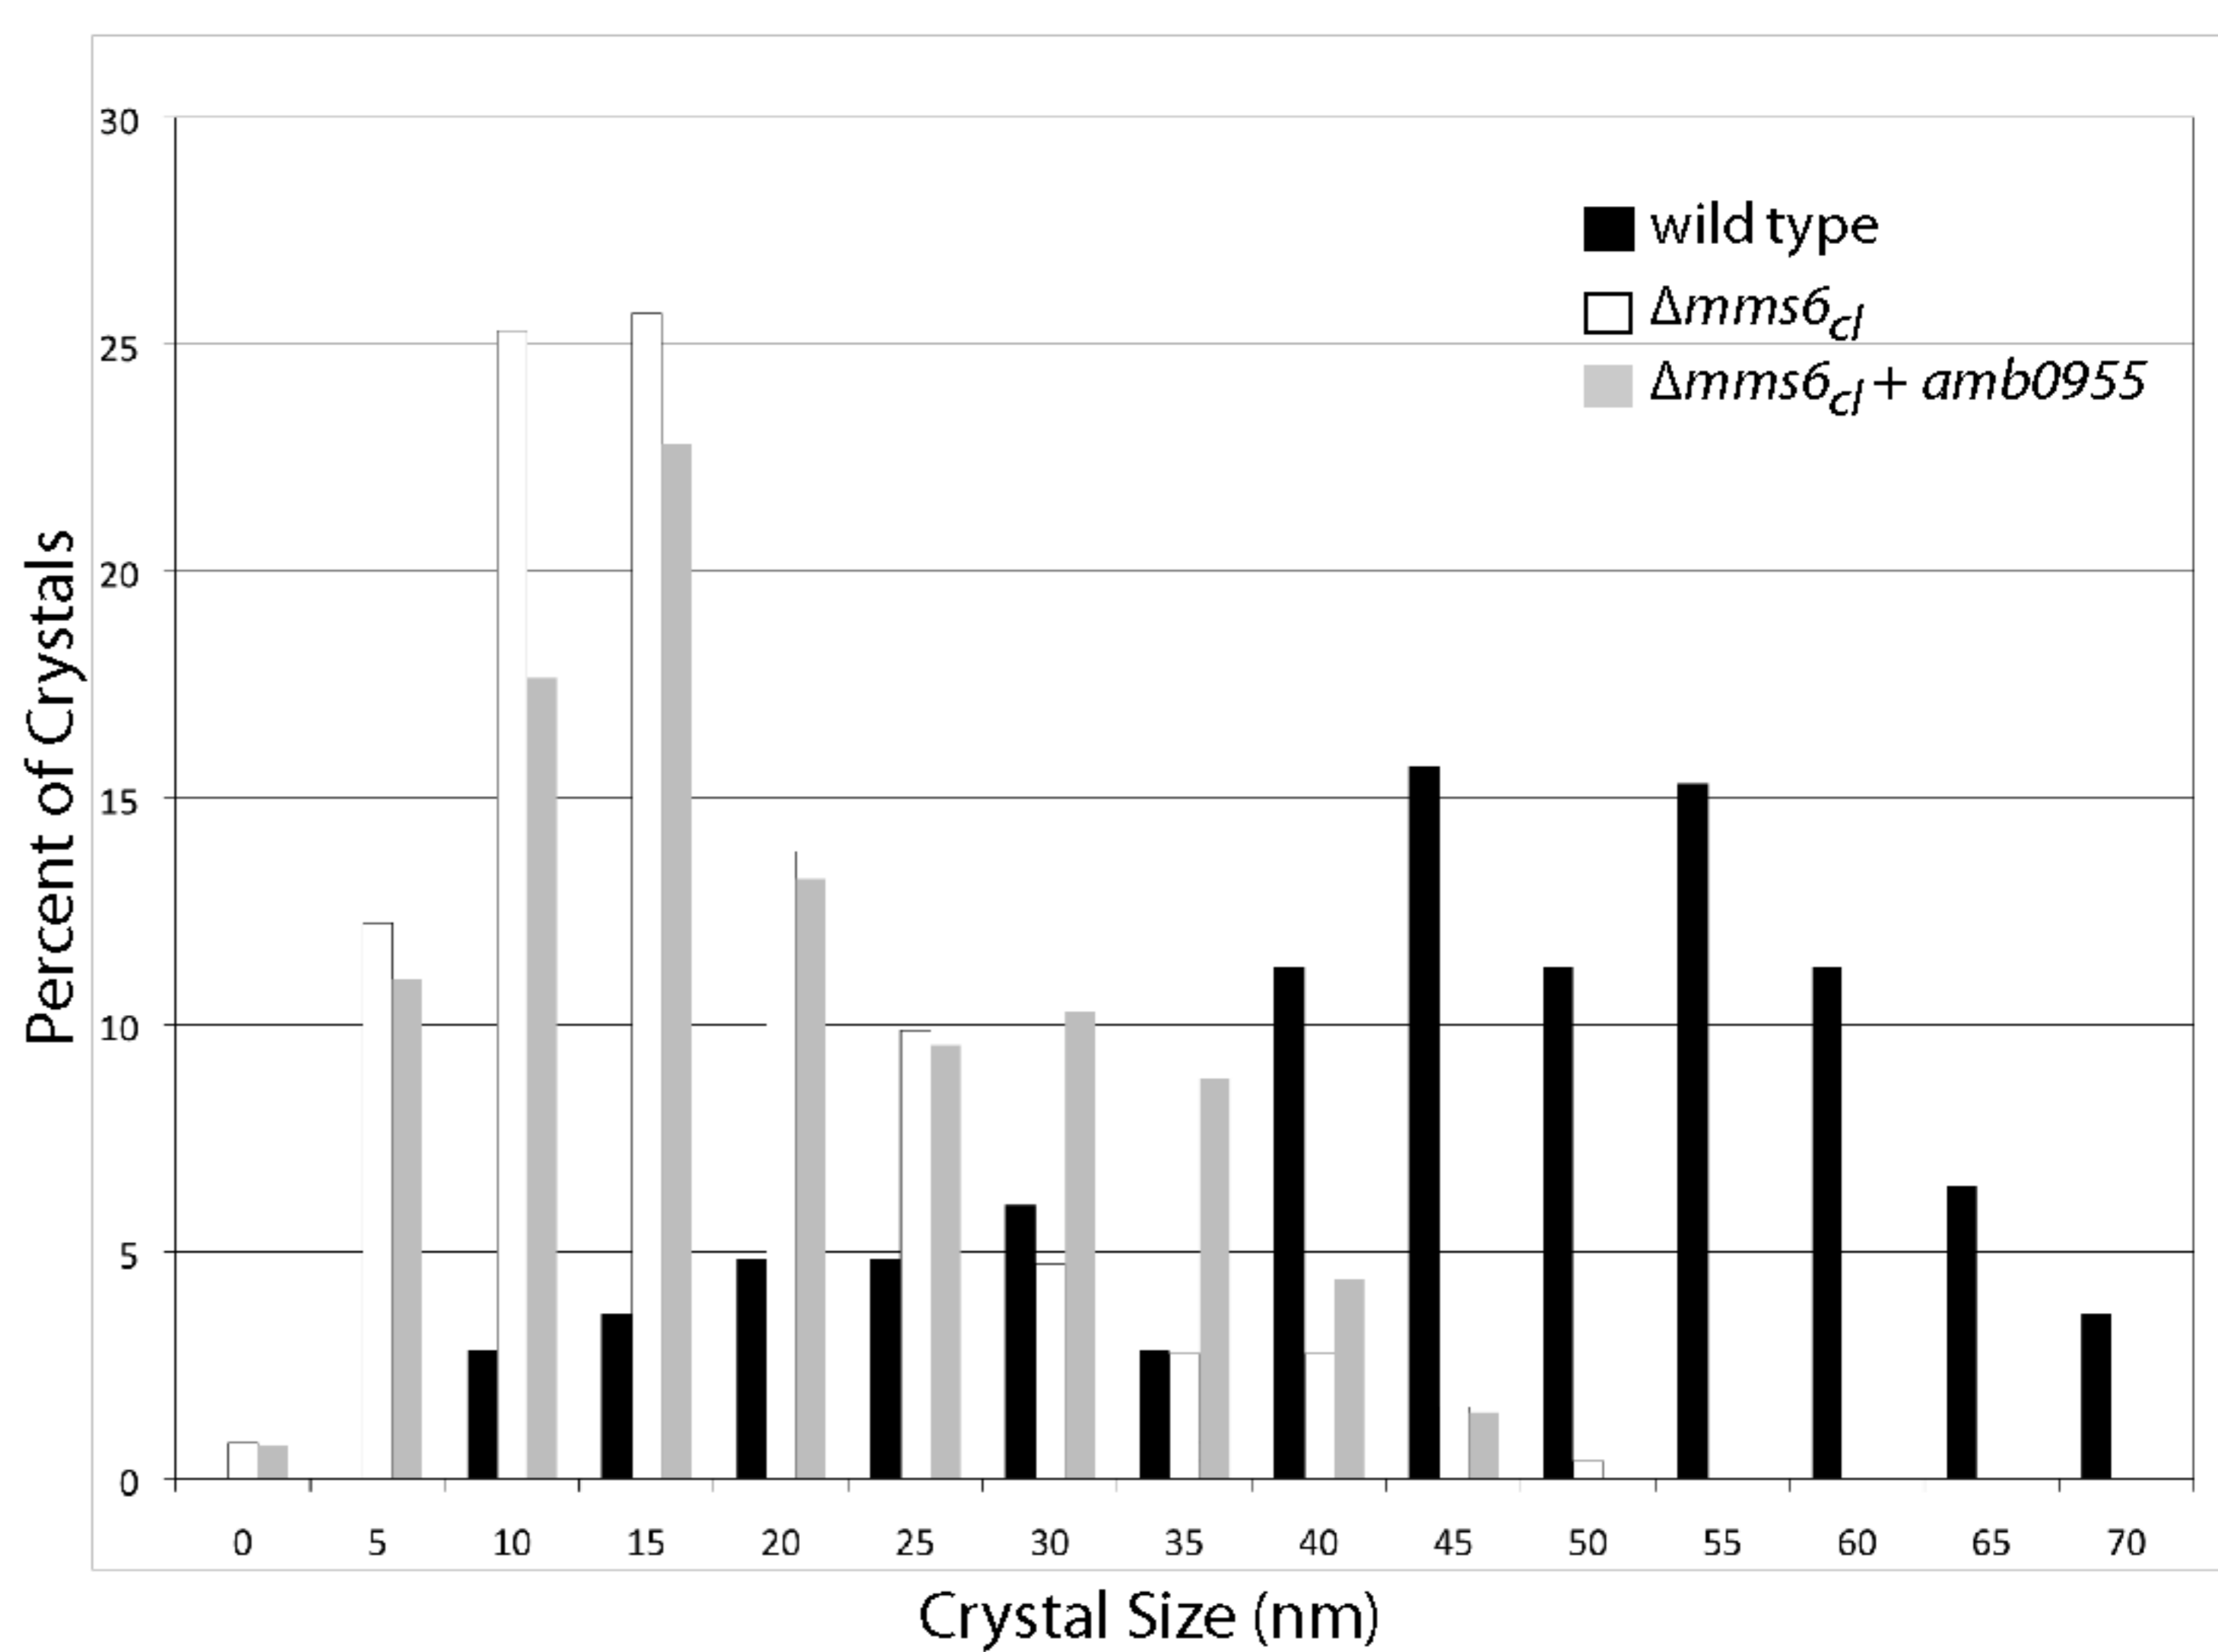

B.

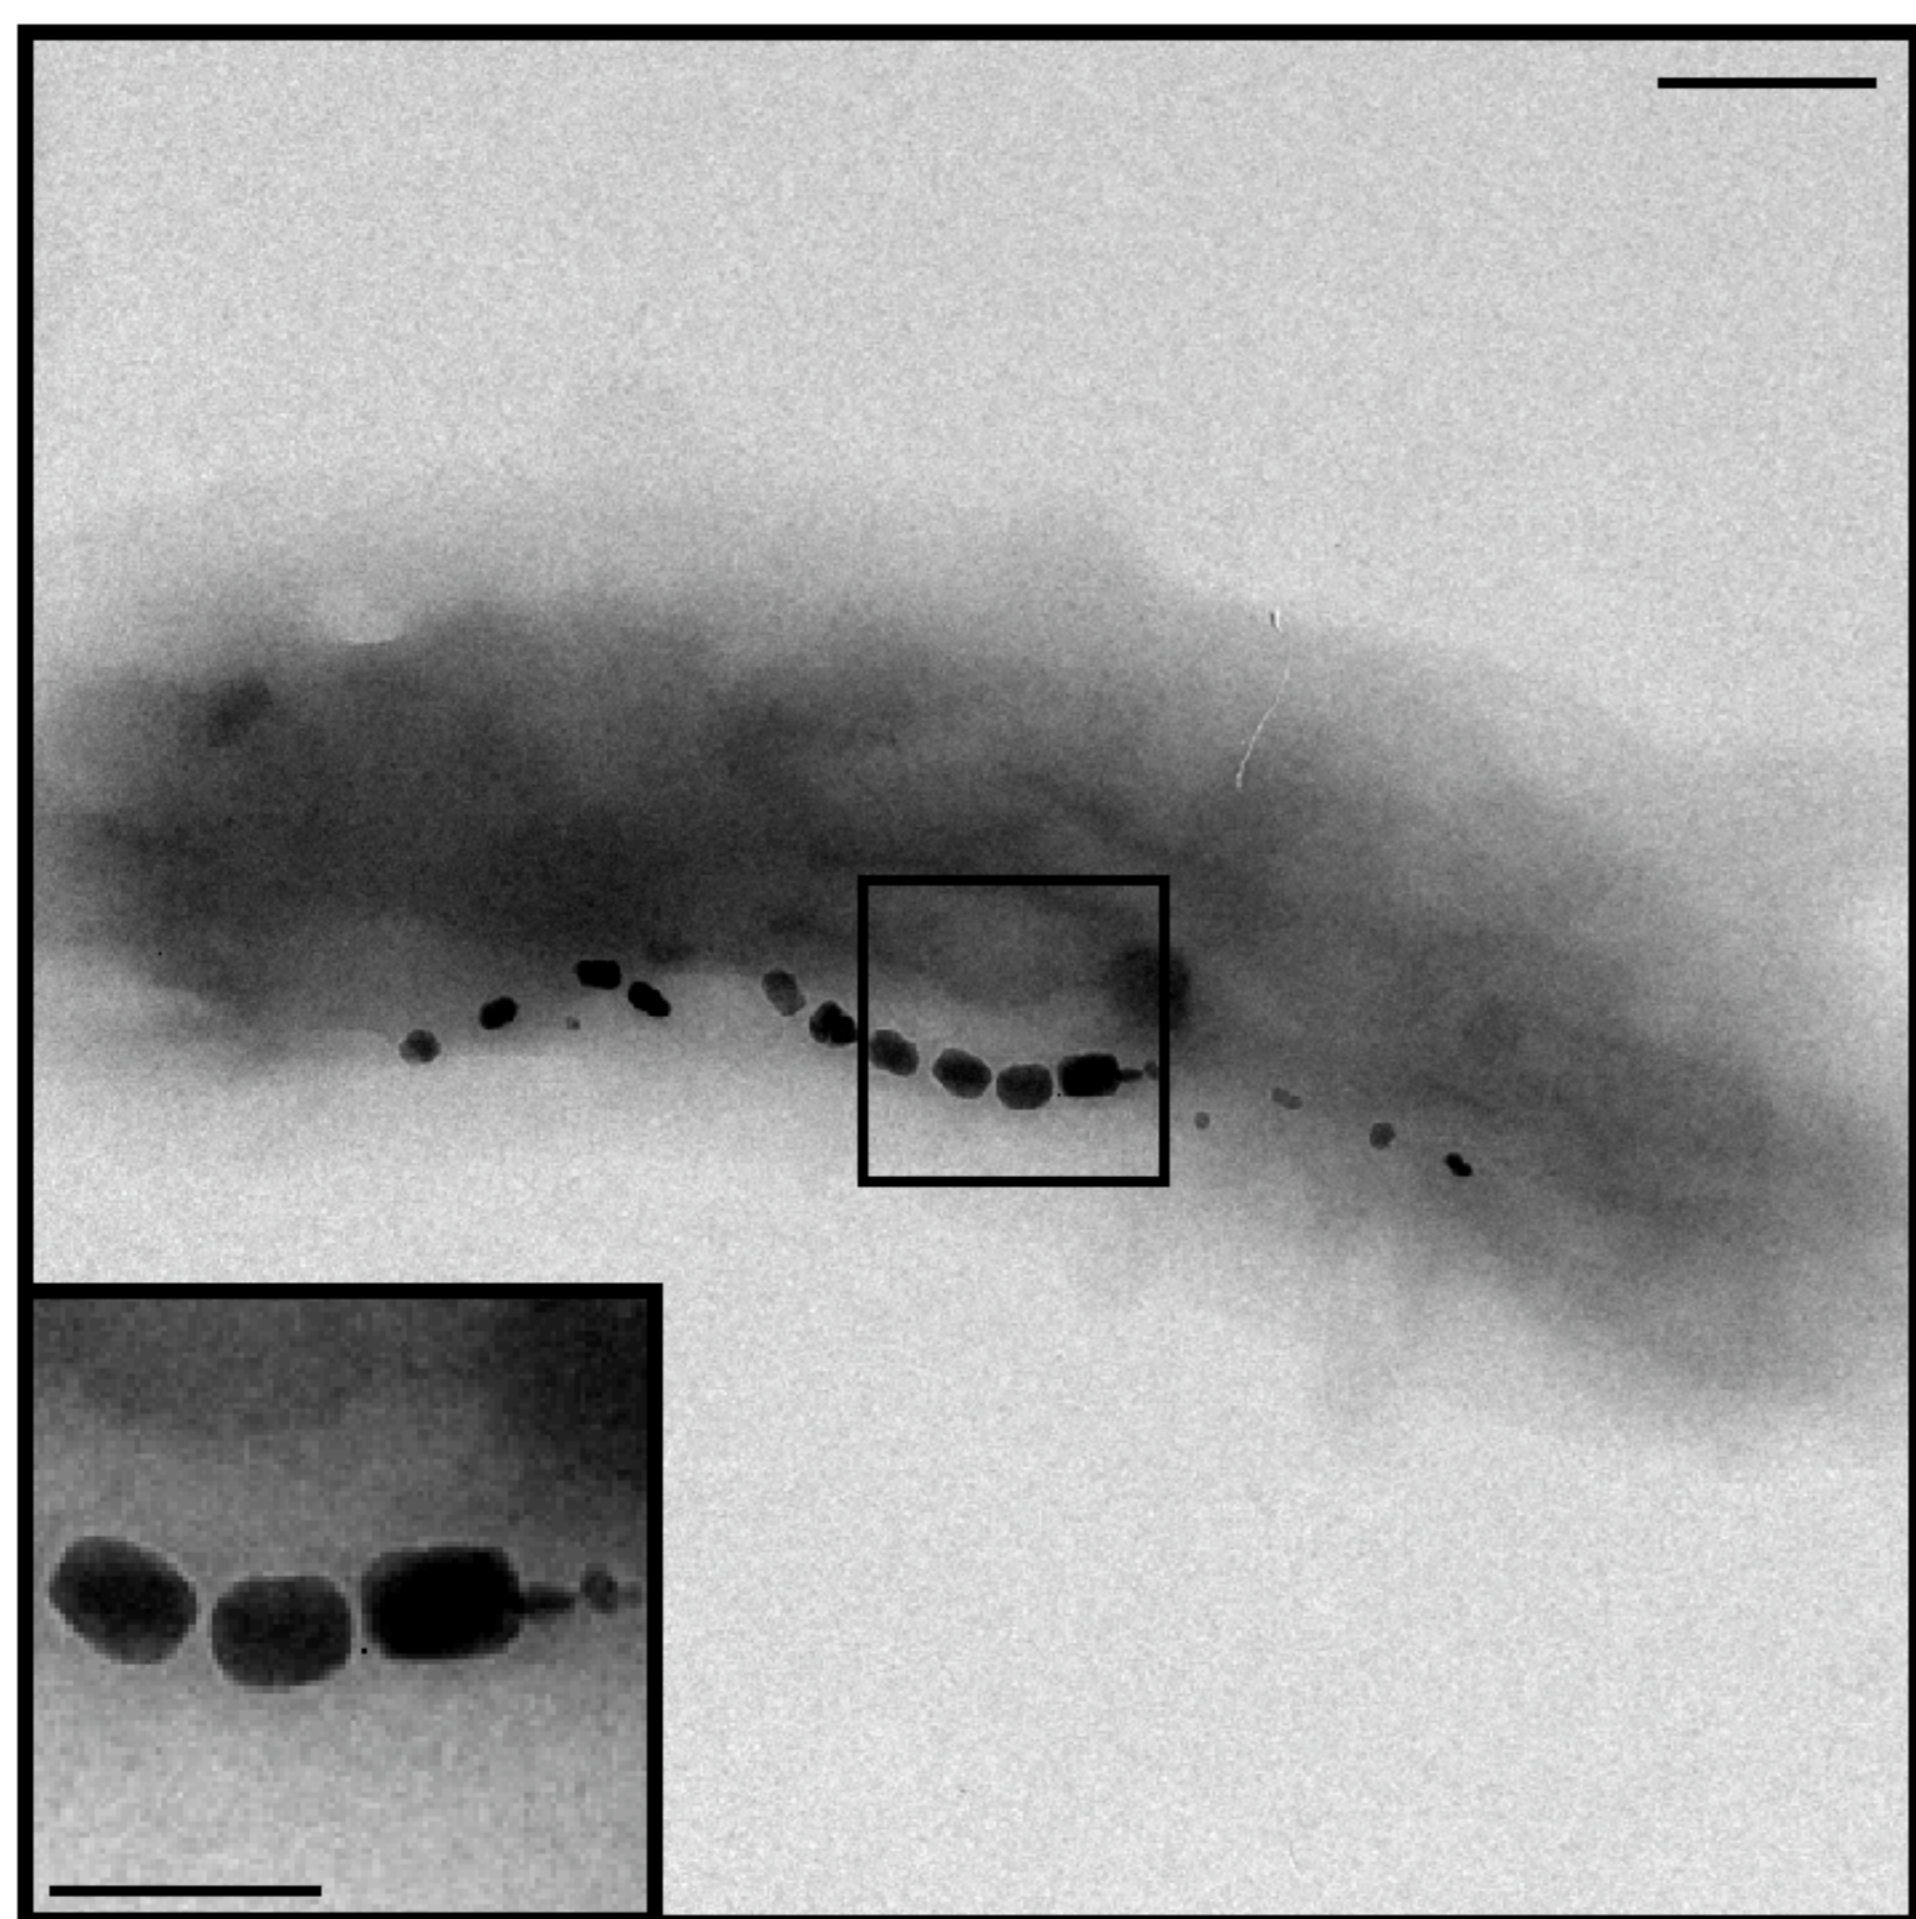 $\Delta mms6$ 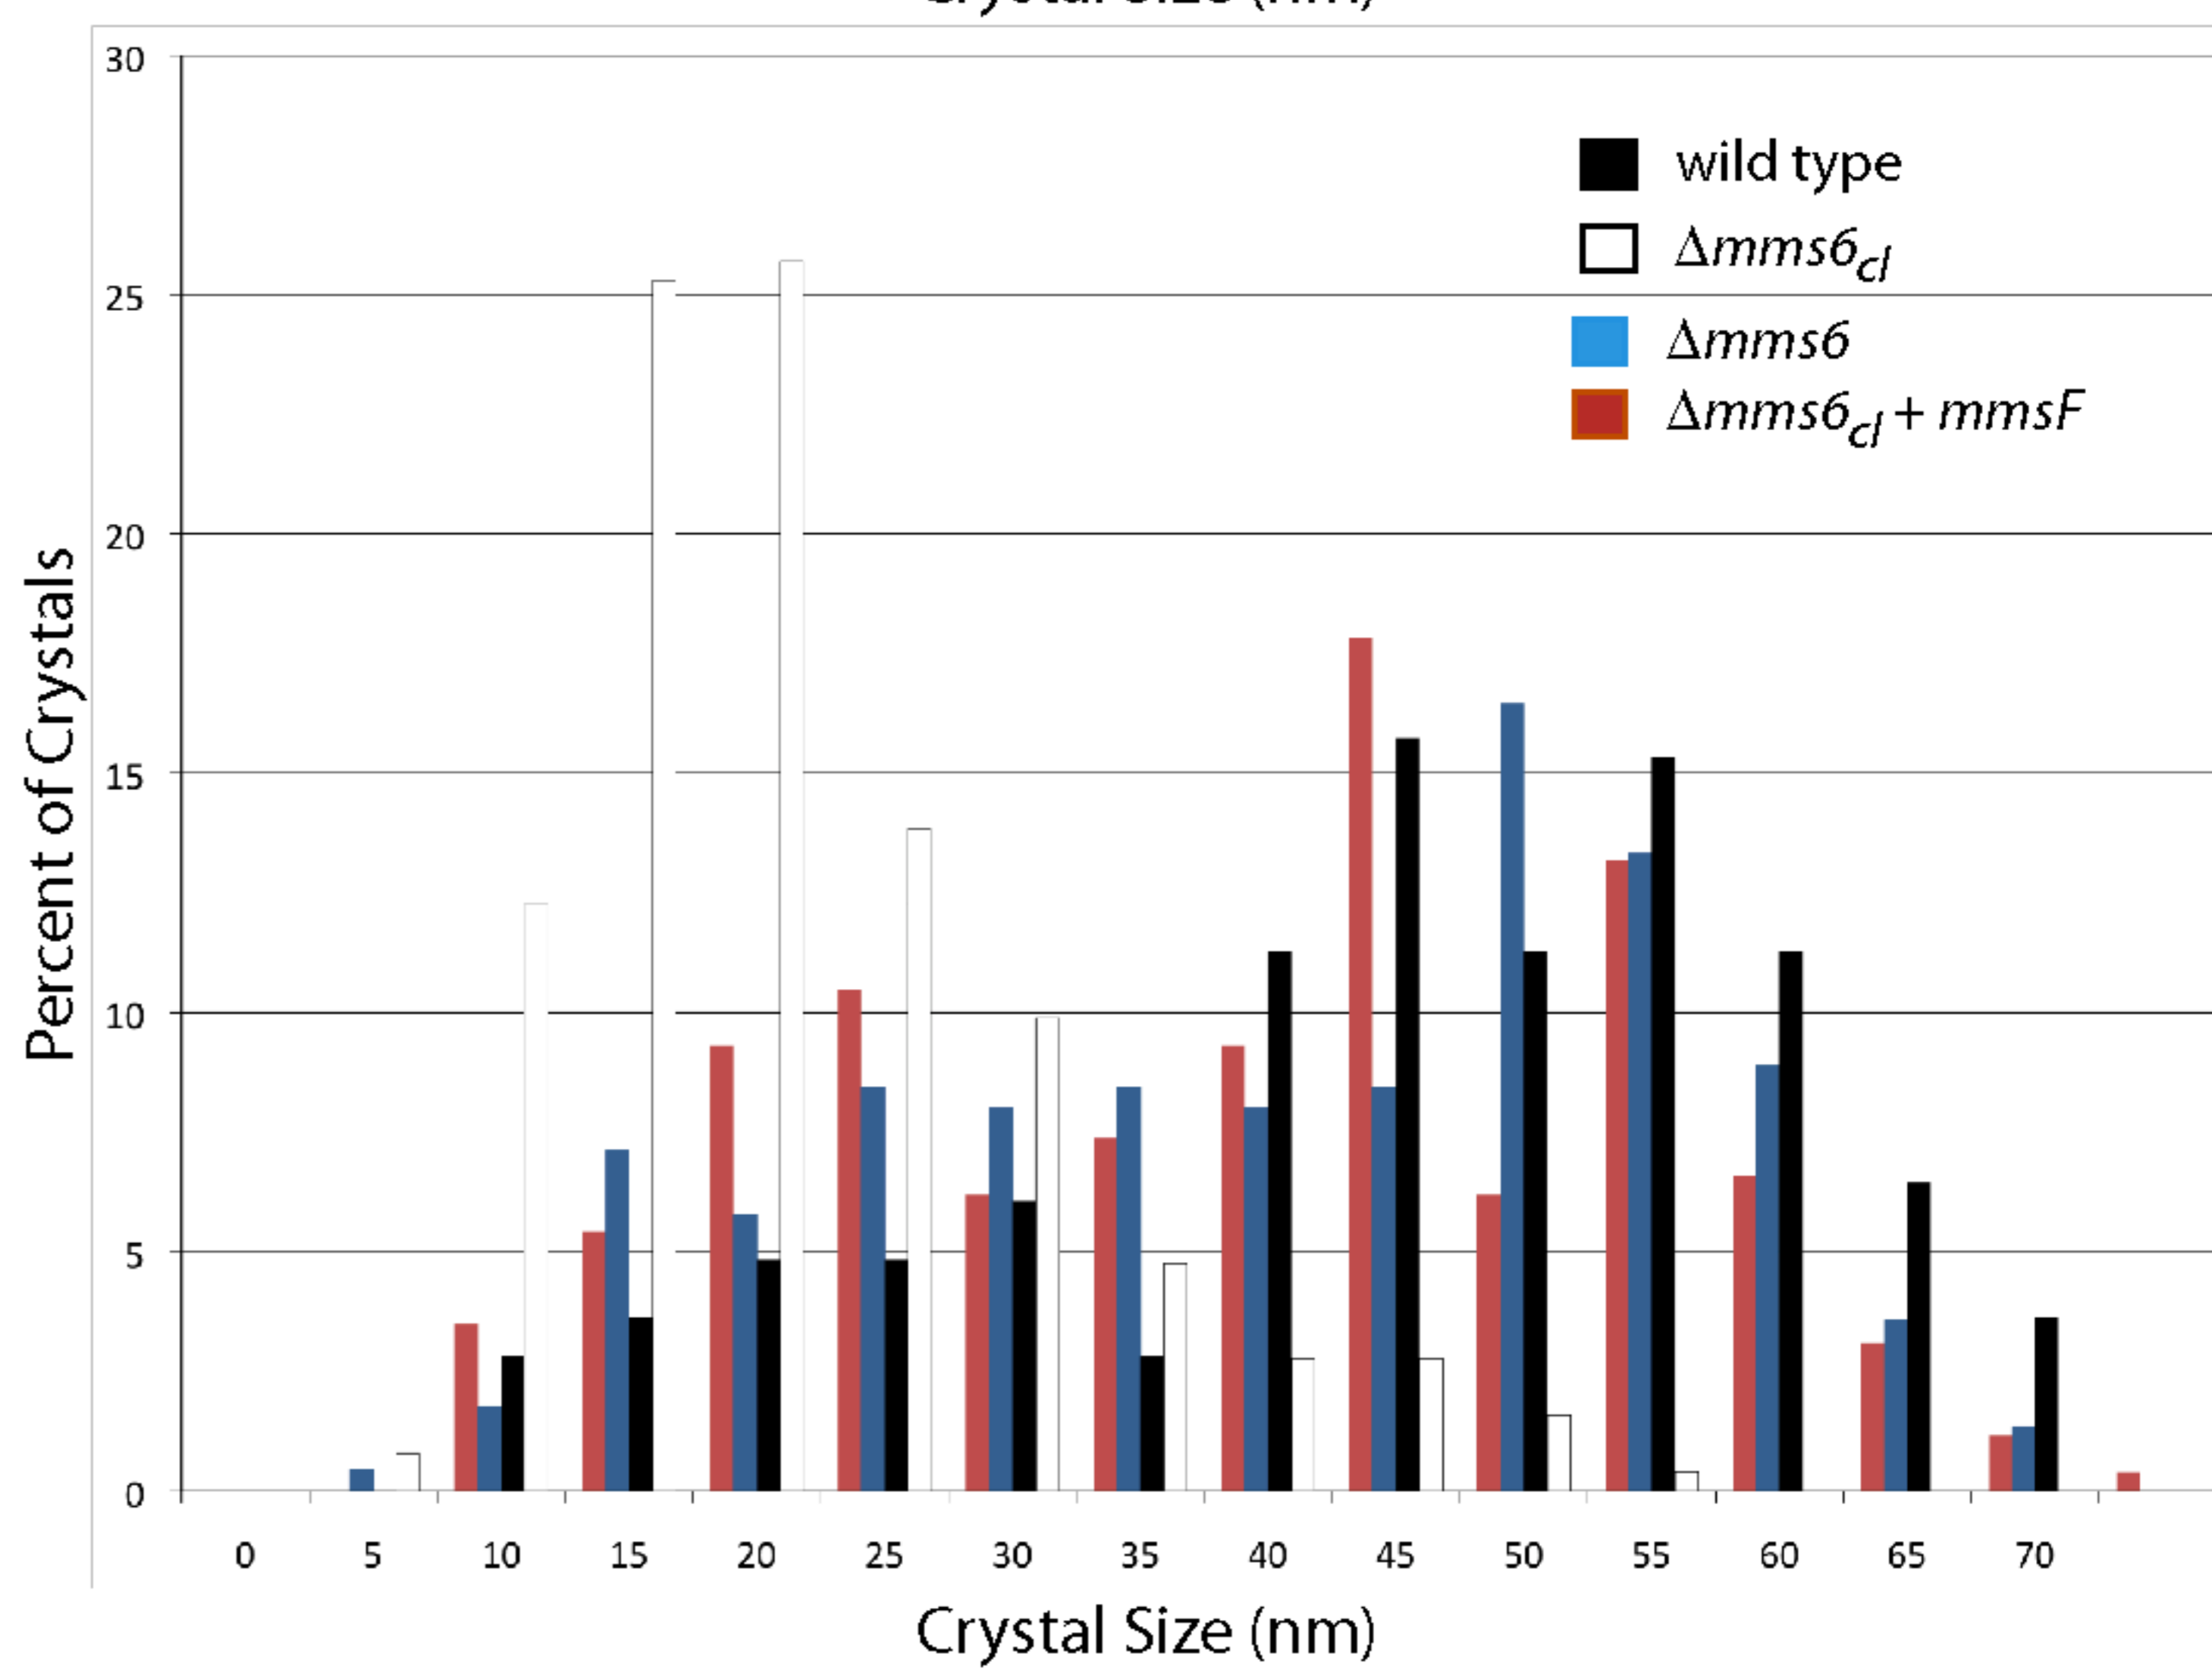

C.

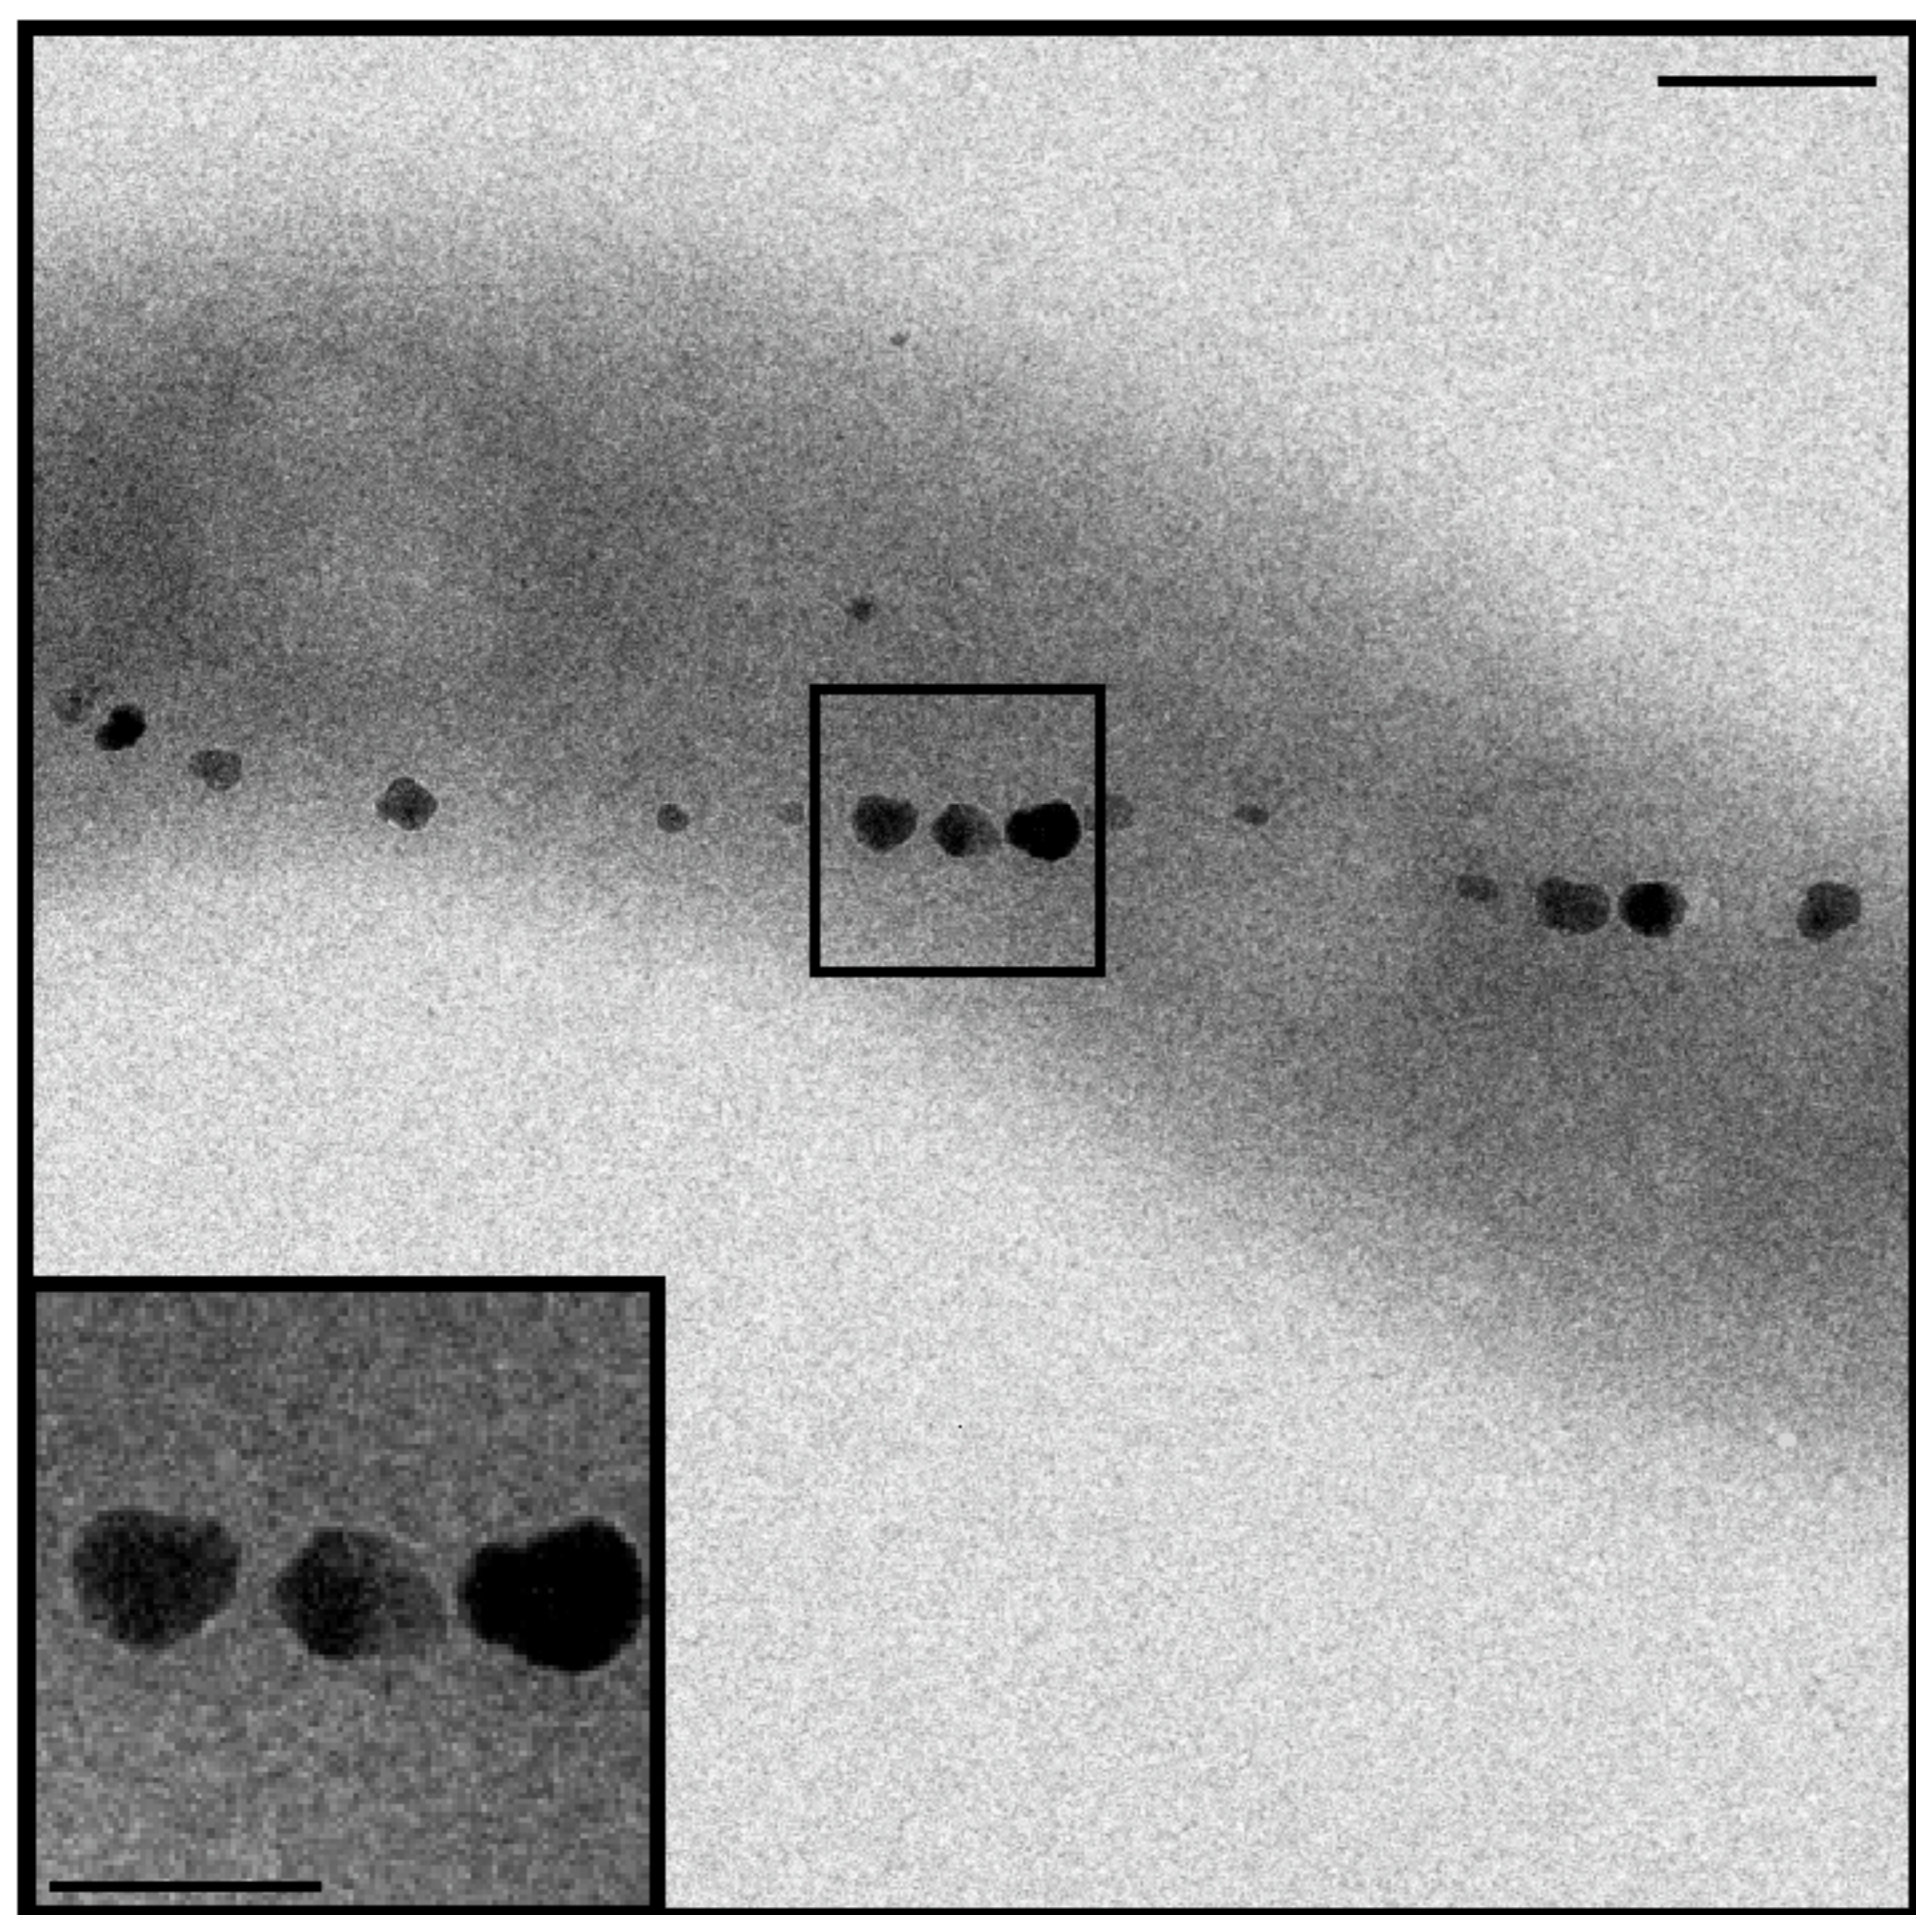 $\Delta mamFDC$ 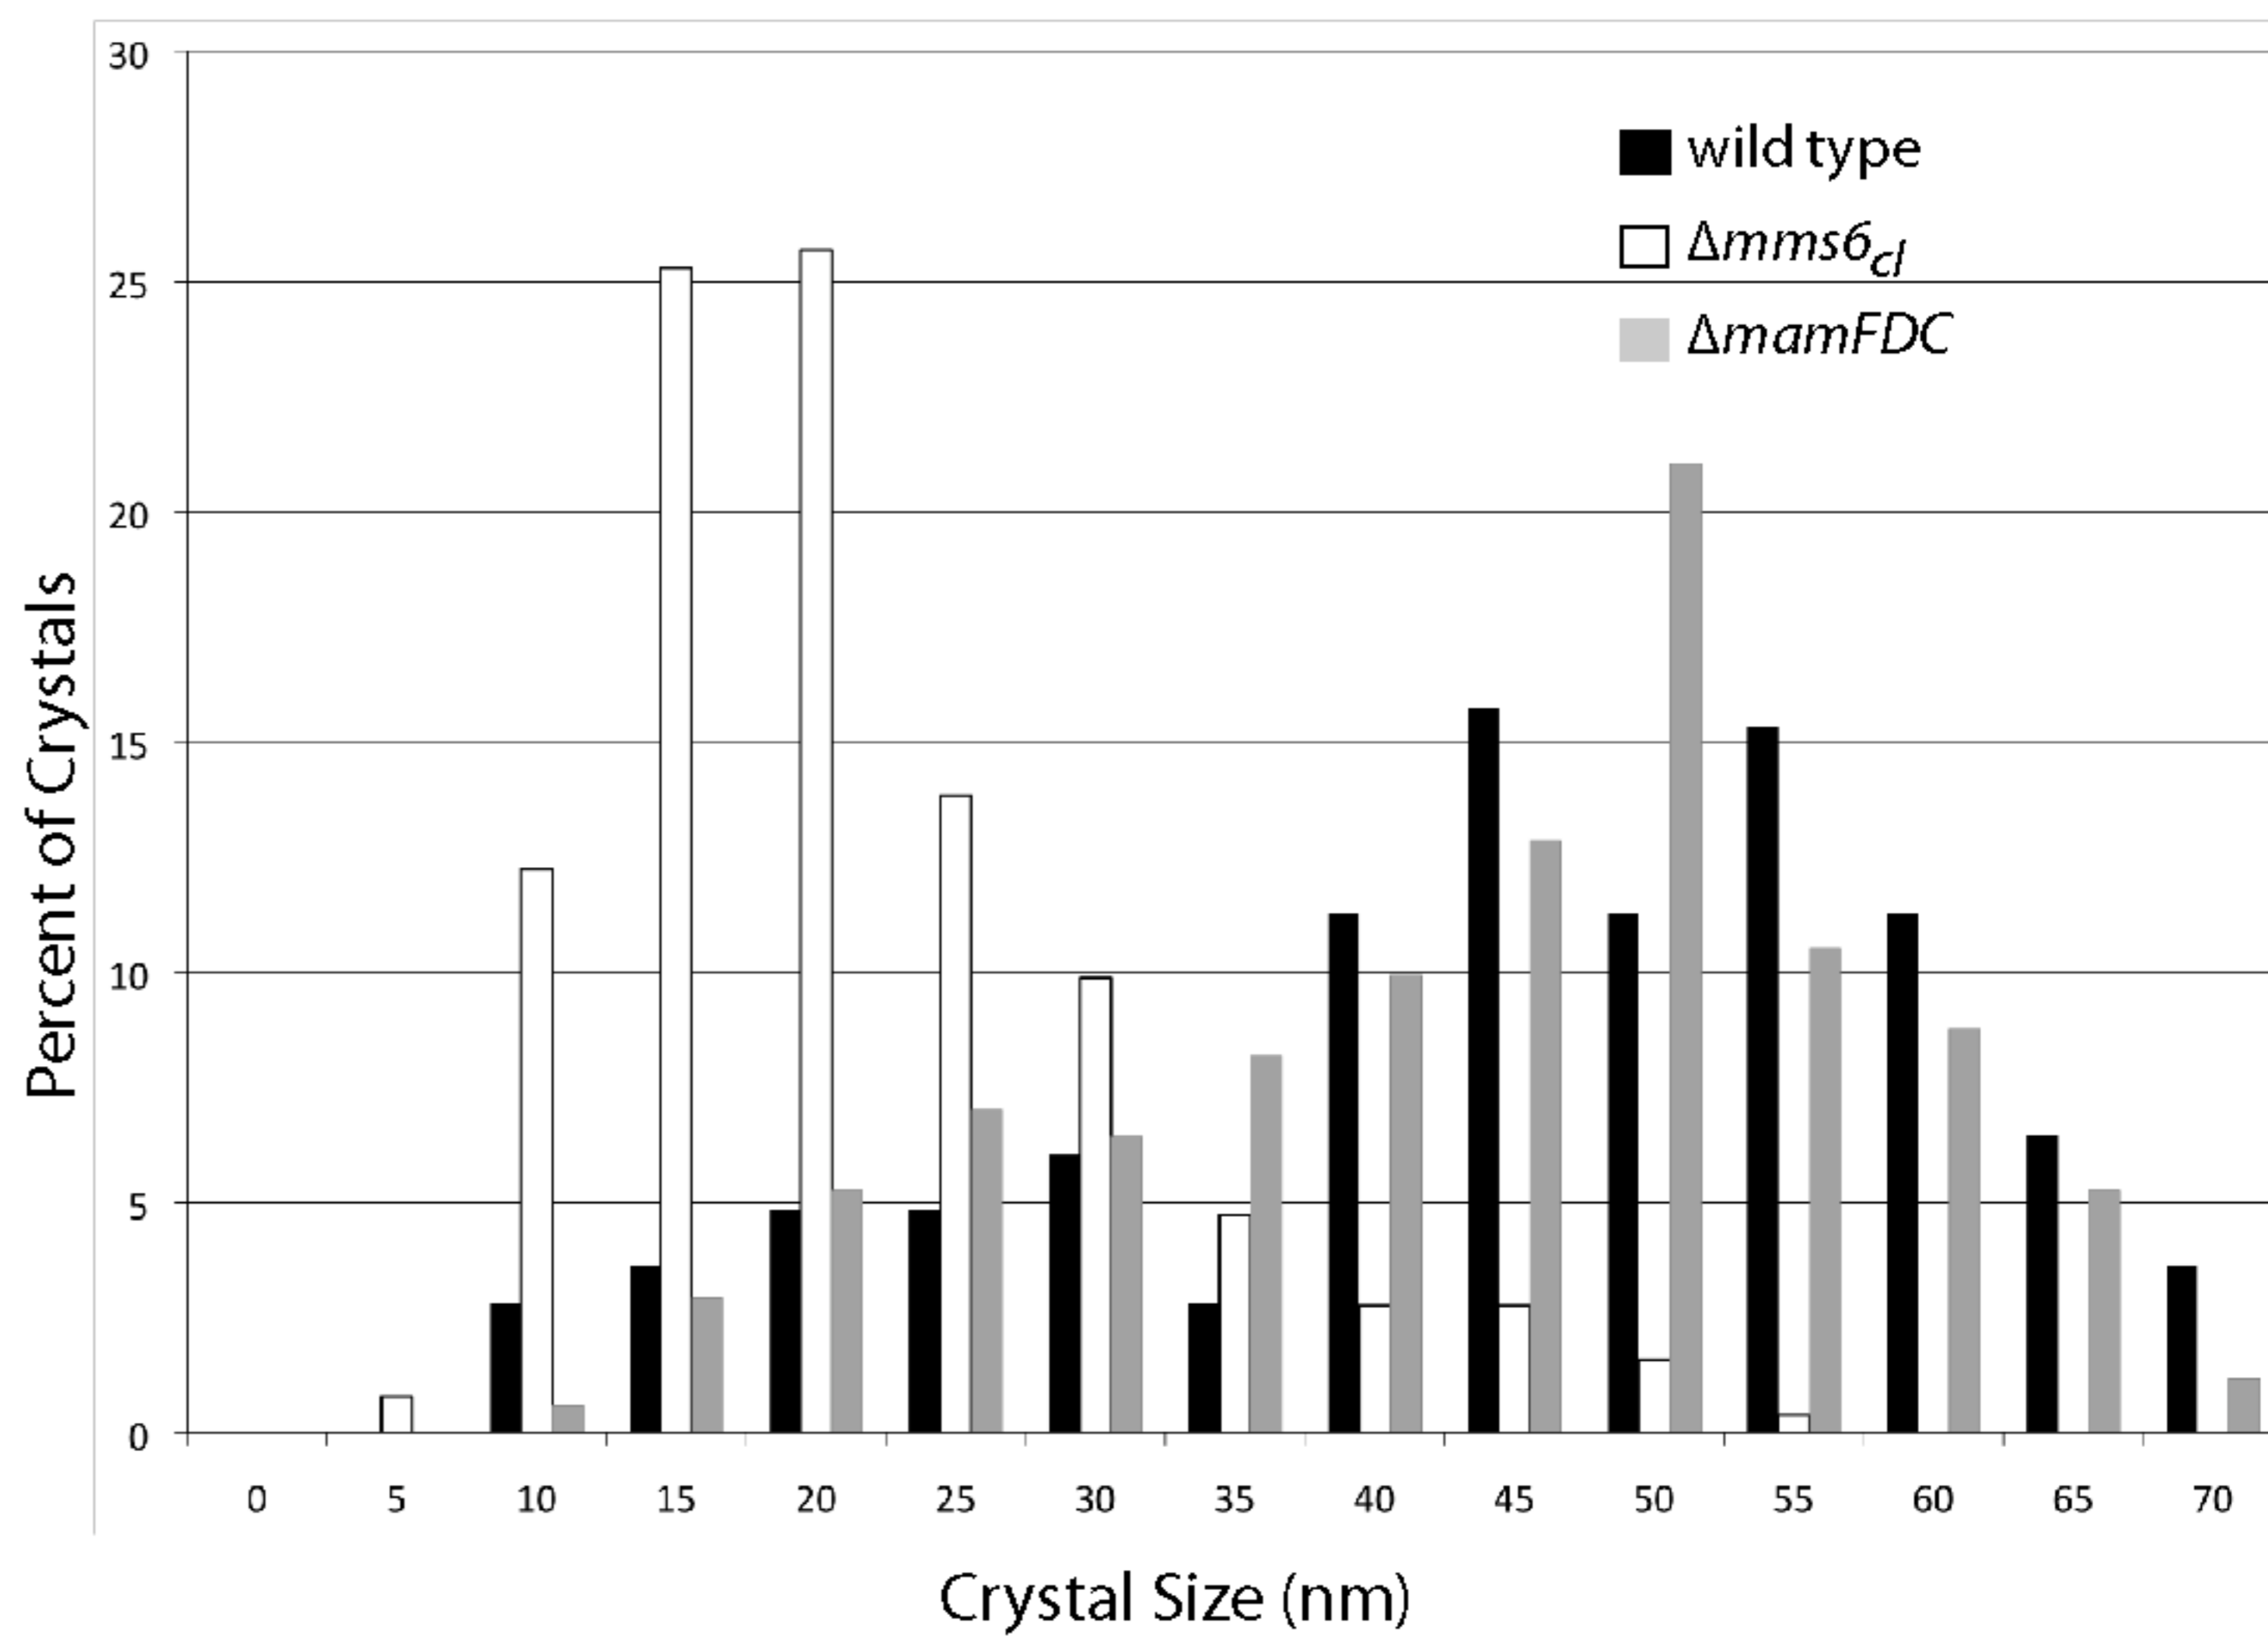

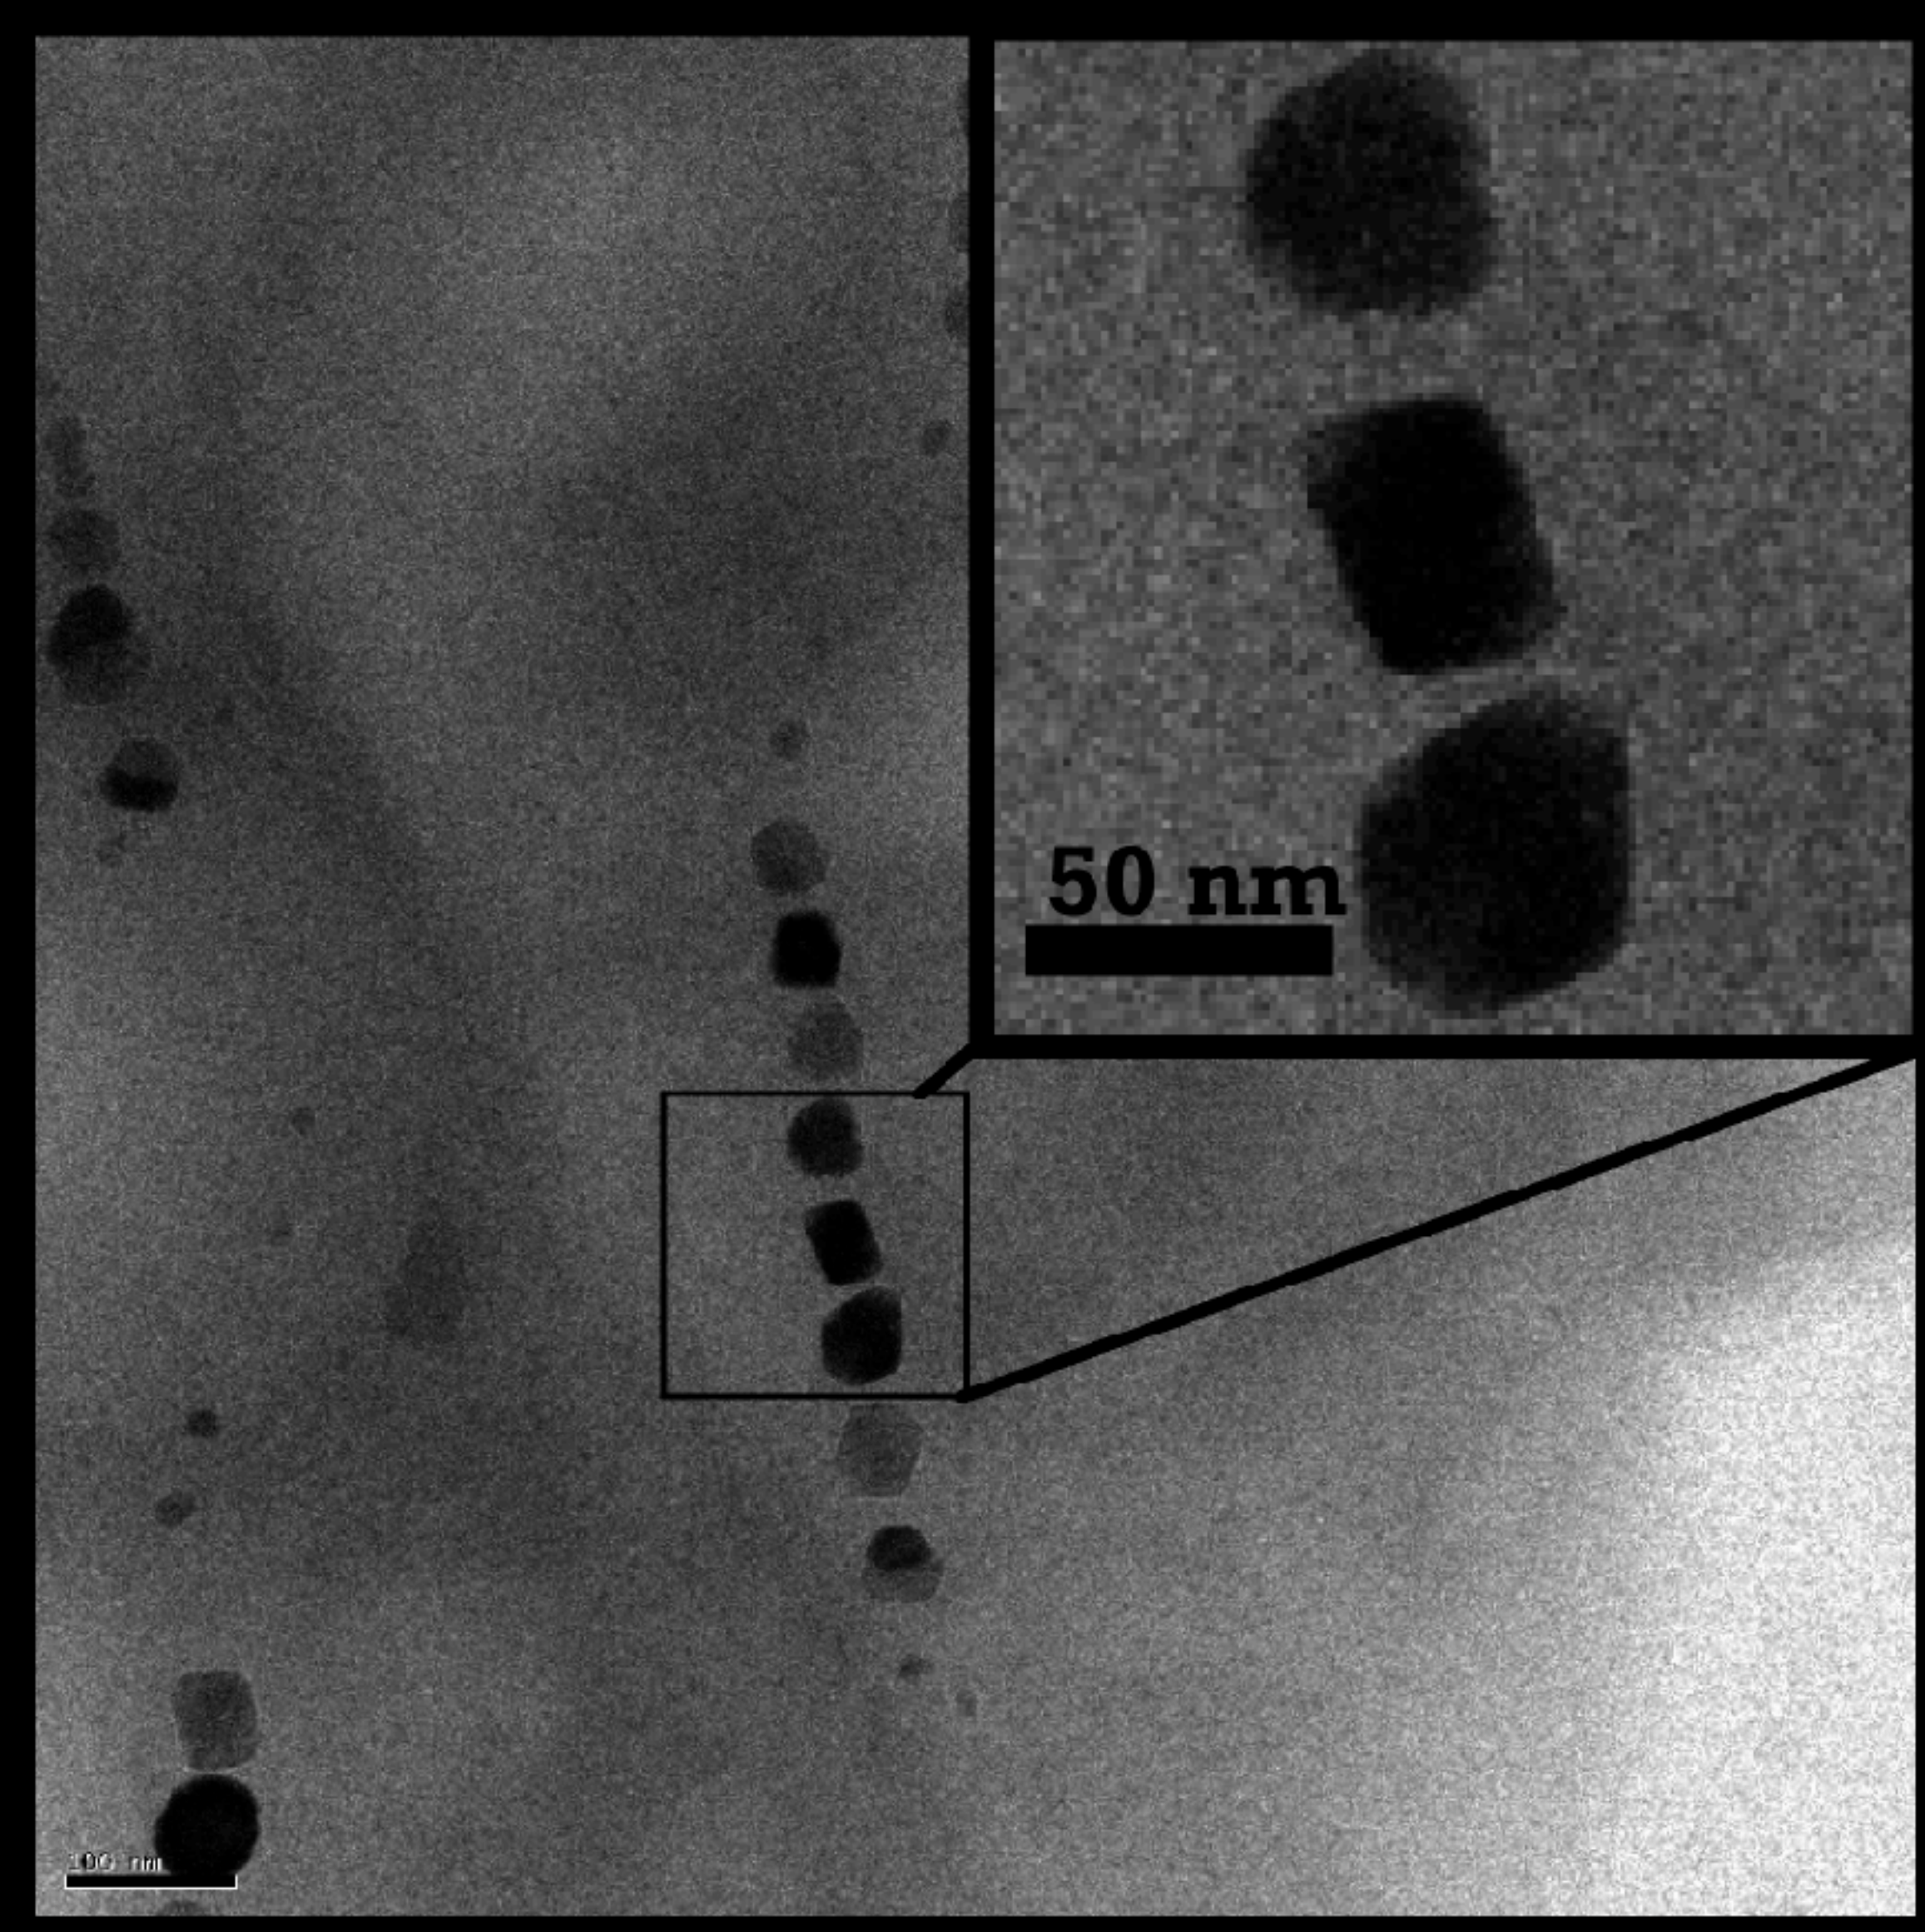

AMB-1

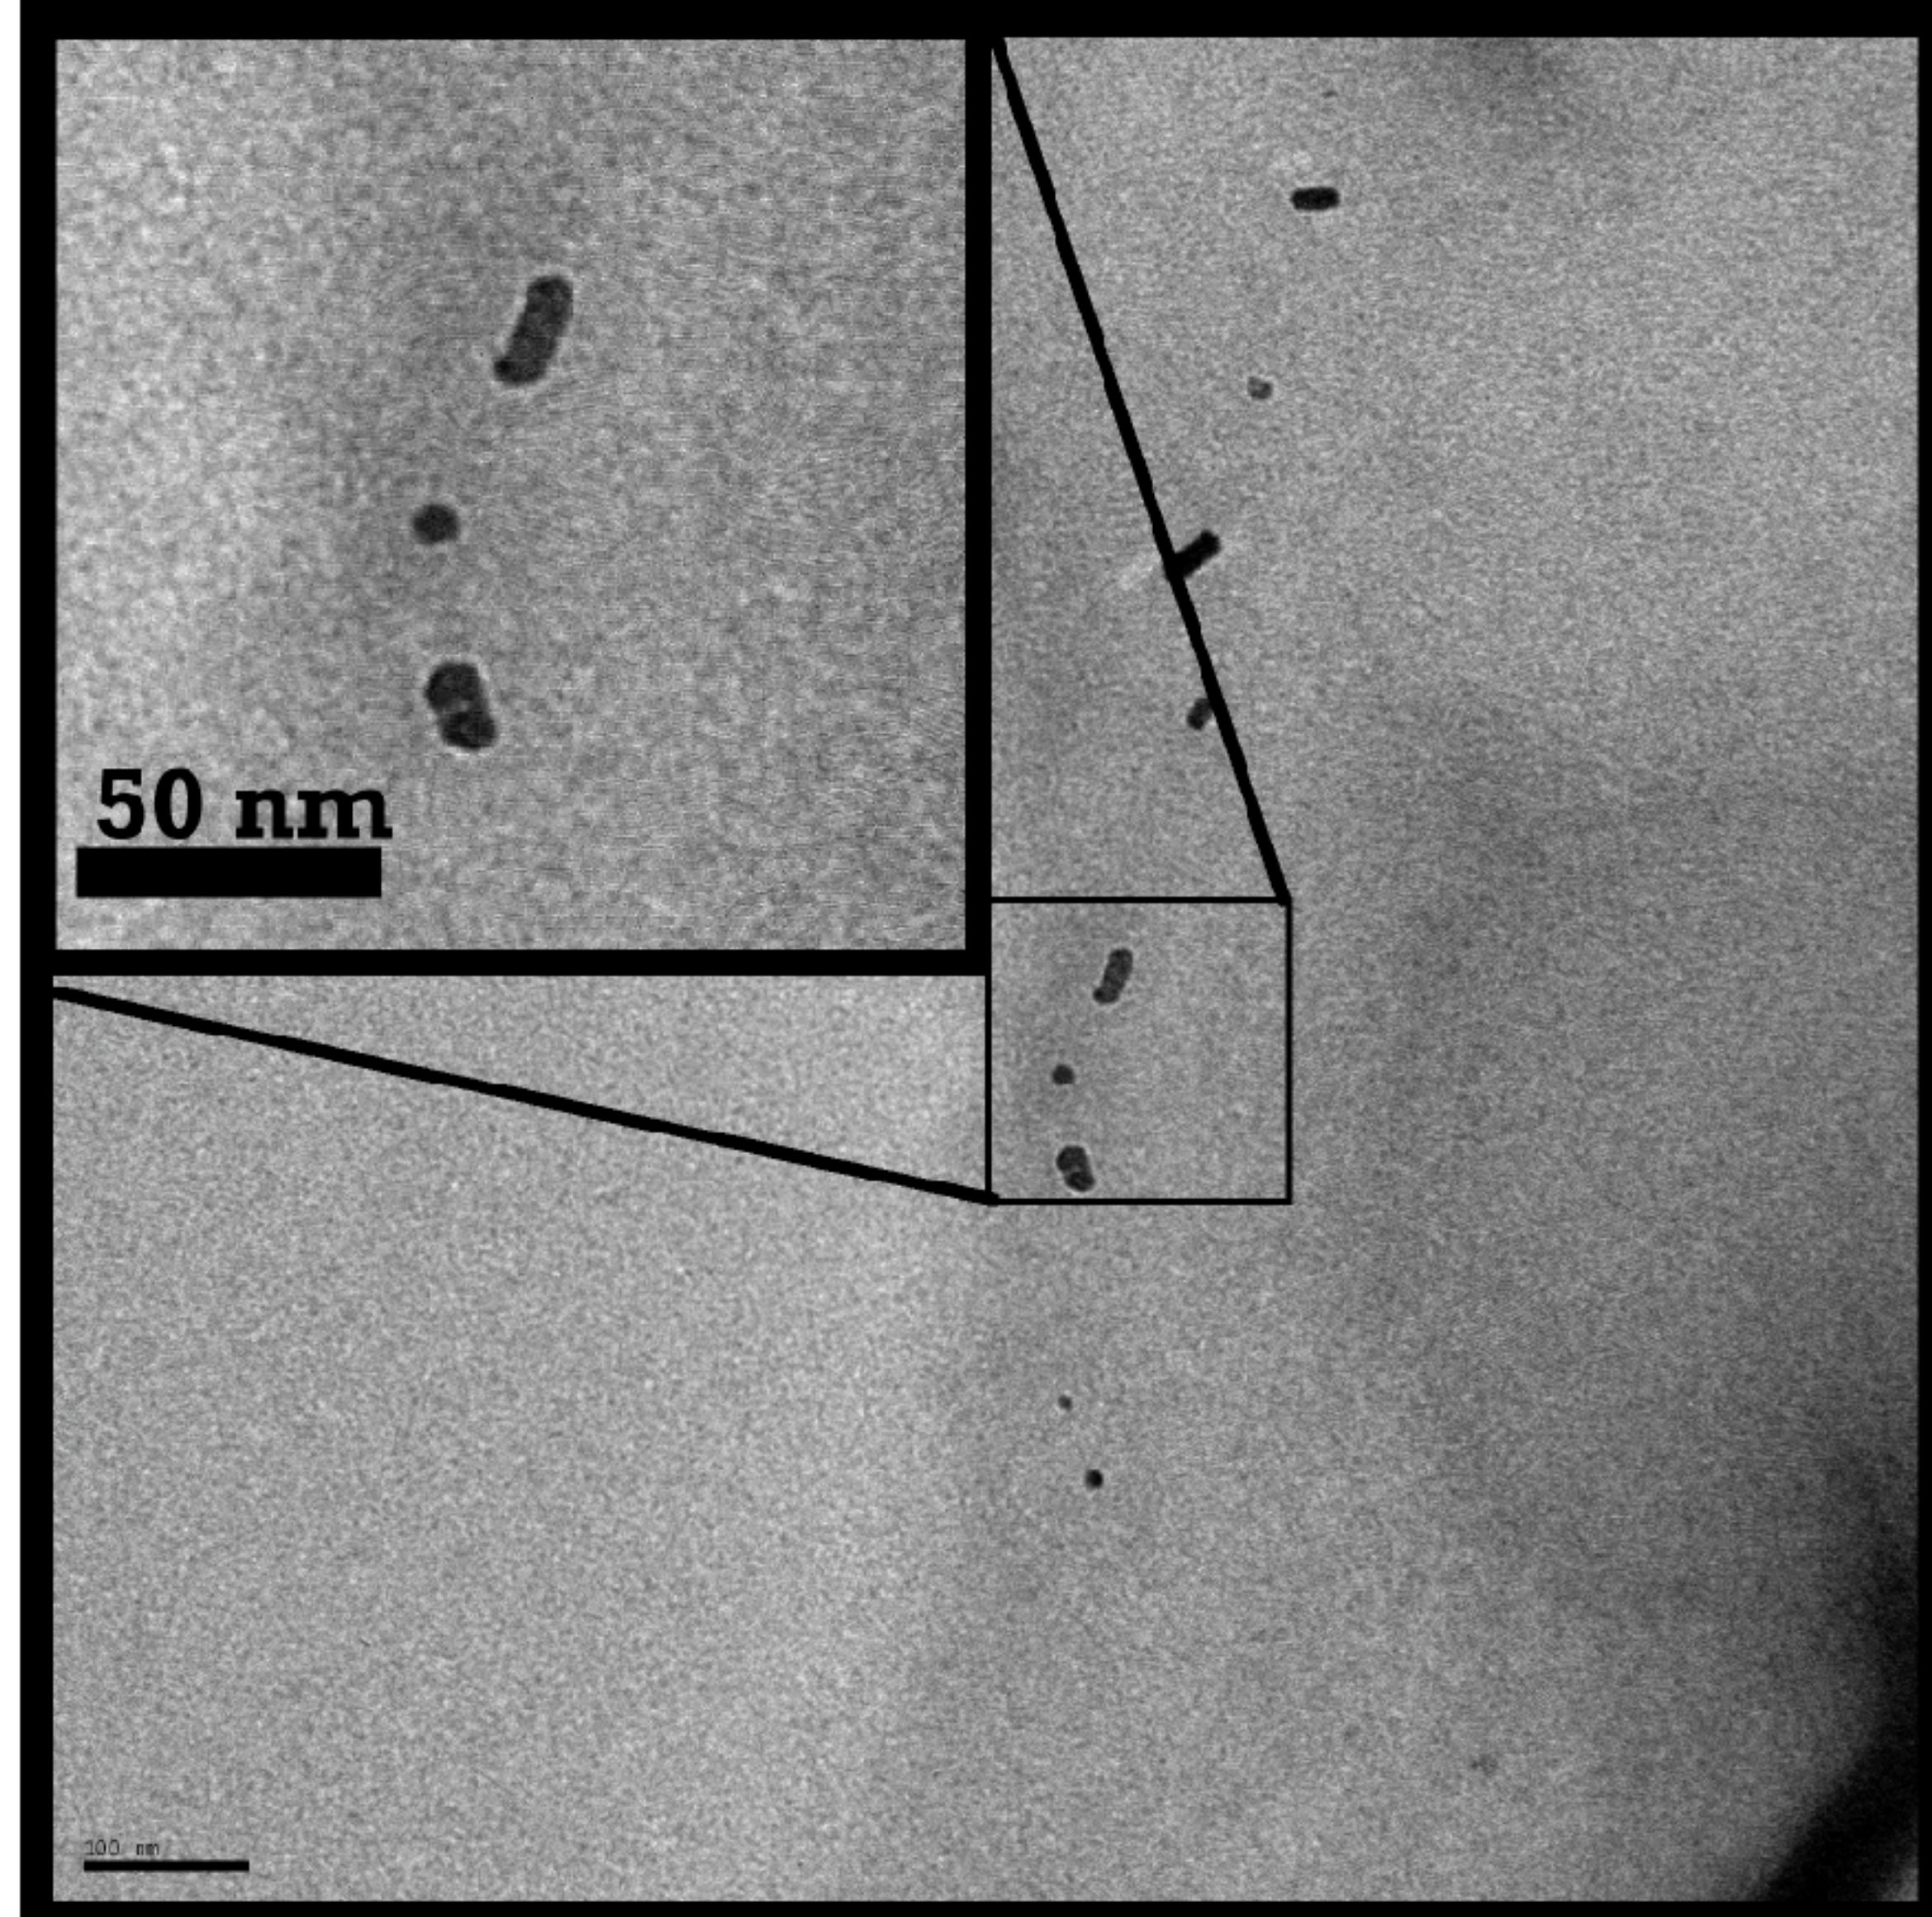

$\Delta$ R1-R4
